# Supplementary material for: Synthesis and PI 3-Kinase Inhibition Activity of Some Novel 2,4,6-Trisubstituted 1,3,5-Triazines
Source: MDPI journal article supplement (doi:10.3390/molecules23071628), 2018-07-04

# Synthesis and PI3 Kinase Inhibition Activity of Some Novel 2,4,6-Trisubstituted 1,3,5-Triazines

Ronald A. Nelson, Jr.<sup>2</sup>, Taylor Schronce<sup>2</sup>, Yue Huang<sup>1</sup>, Arwa Alghuneim<sup>3</sup>, Lamy Al Fuhaid<sup>3</sup>, Alanoud Albugumi<sup>3</sup>, George Kulik<sup>1,3\*</sup> and Mark E. Welker<sup>2\*</sup>

<sup>1</sup>Department of Cancer Biology and Comprehensive Cancer Center, Wake Forest School of Medicine, Medical Center Blvd., Winston-Salem, NC 27157, USA

<sup>2</sup>Department of Chemistry, Wake Forest University, Winston-Salem, NC 27109, USA

<sup>3</sup> Life Sciences program, College of Science, Alfaisal University, Riyadh 11533, Saudi Arabia.

\*To whom correspondence should be addressed.

George Kulik, DVM, PhD. Department of Cancer Biology and Comprehensive Cancer Center Wake Forest University School of Medicine, Medical Center Blvd., Winston-Salem, NC 27127-1083, USA. Tel.: 336-713-7650. E-mail: [gkulik@wakehealth.edu](mailto:gkulik@wakehealth.edu)

Mark E Welker, PhD. Department of Chemistry, Wake Forest University, P.O. Box 7486, Winston-Salem, NC 27109, USA. Tel.: 336-758-5758. E-mail: [welker@wfu.edu](mailto:welker@wfu.edu)

**Supplementary Material:** Spectral Data for New Compounds Reported Follows.

Jun02-2016-schre13.2.fid  
 TS012 after column and vacuum pump  
 wfu\_C13CPD\_10k\_CD3 /pp/vopspin schre13.28

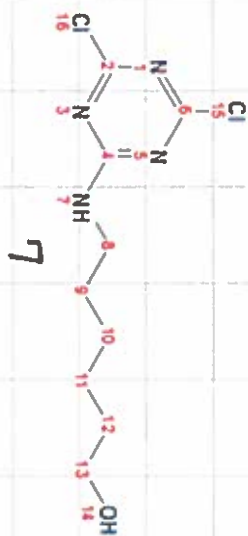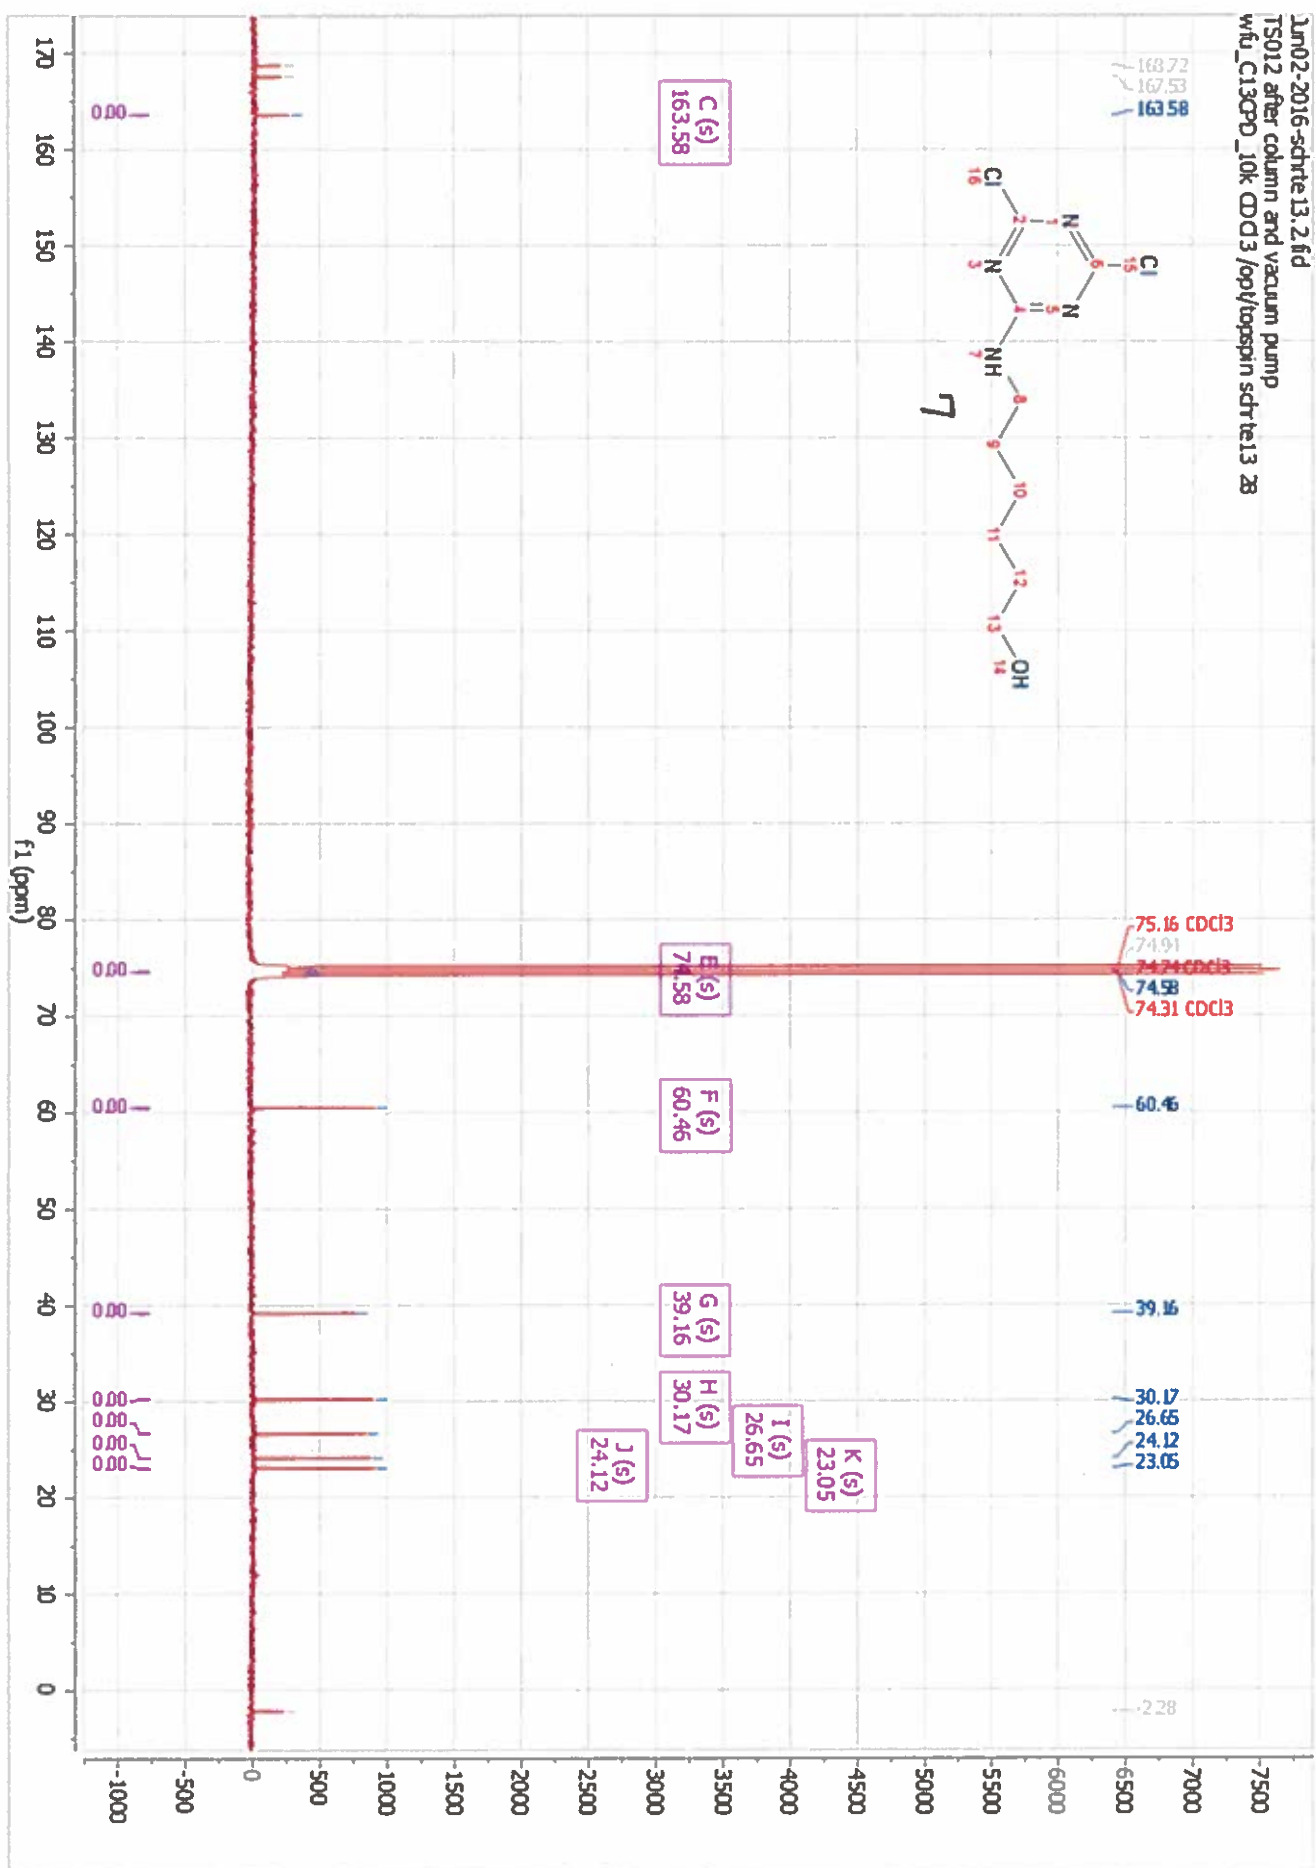

4-(4,6-dichloro-1,3,5-triazin-2-yl)morpholine, 9a.

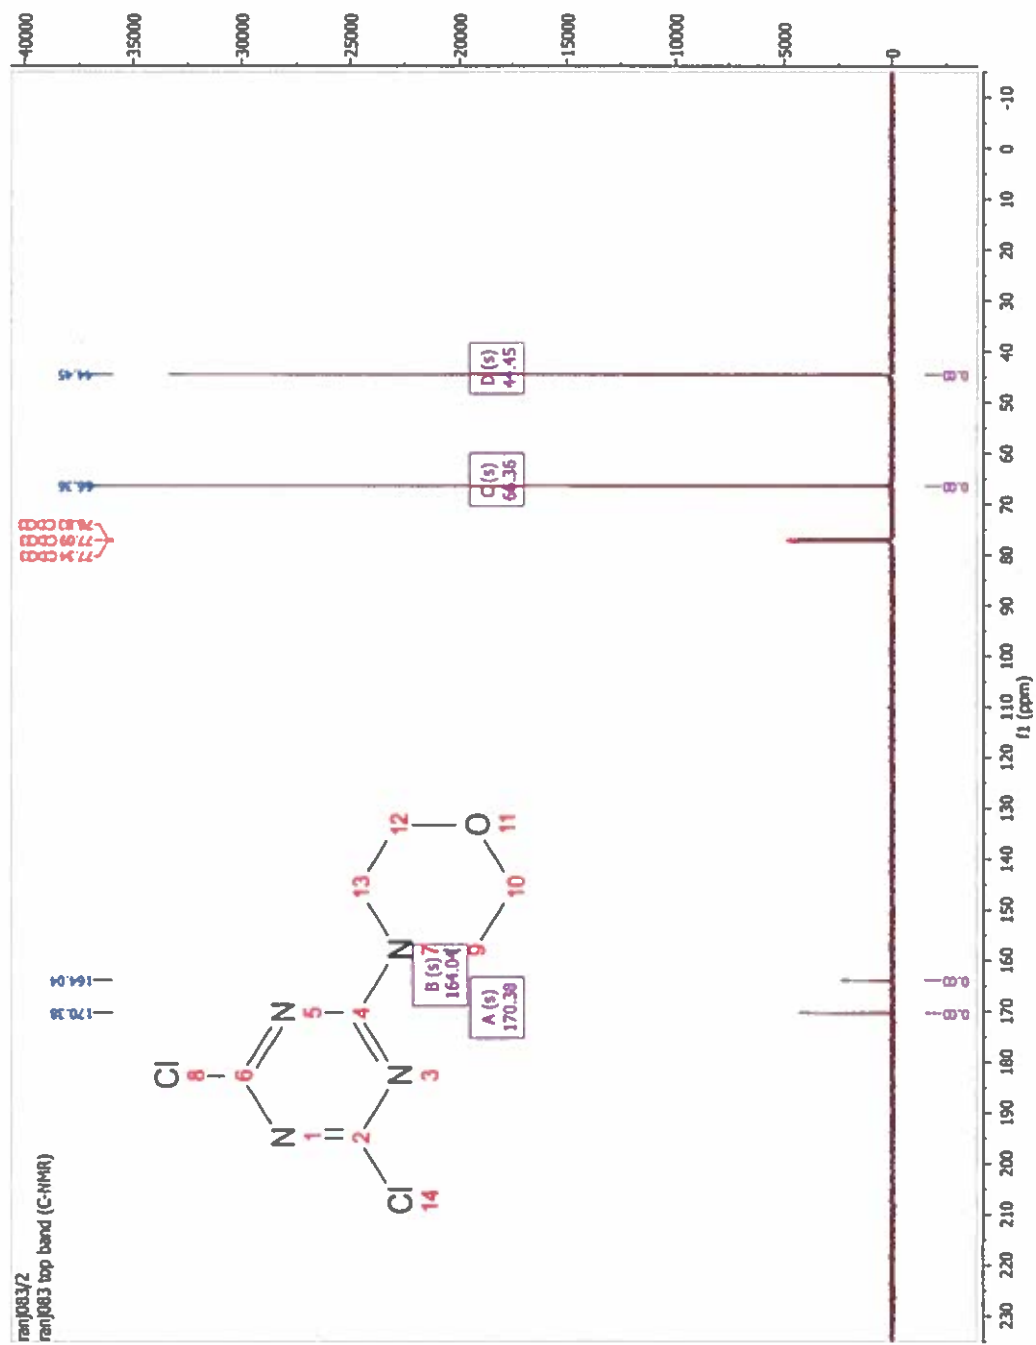

[illegible]

Apr19-2017-nelsra12.20.fid  
 RANJ159 - RED

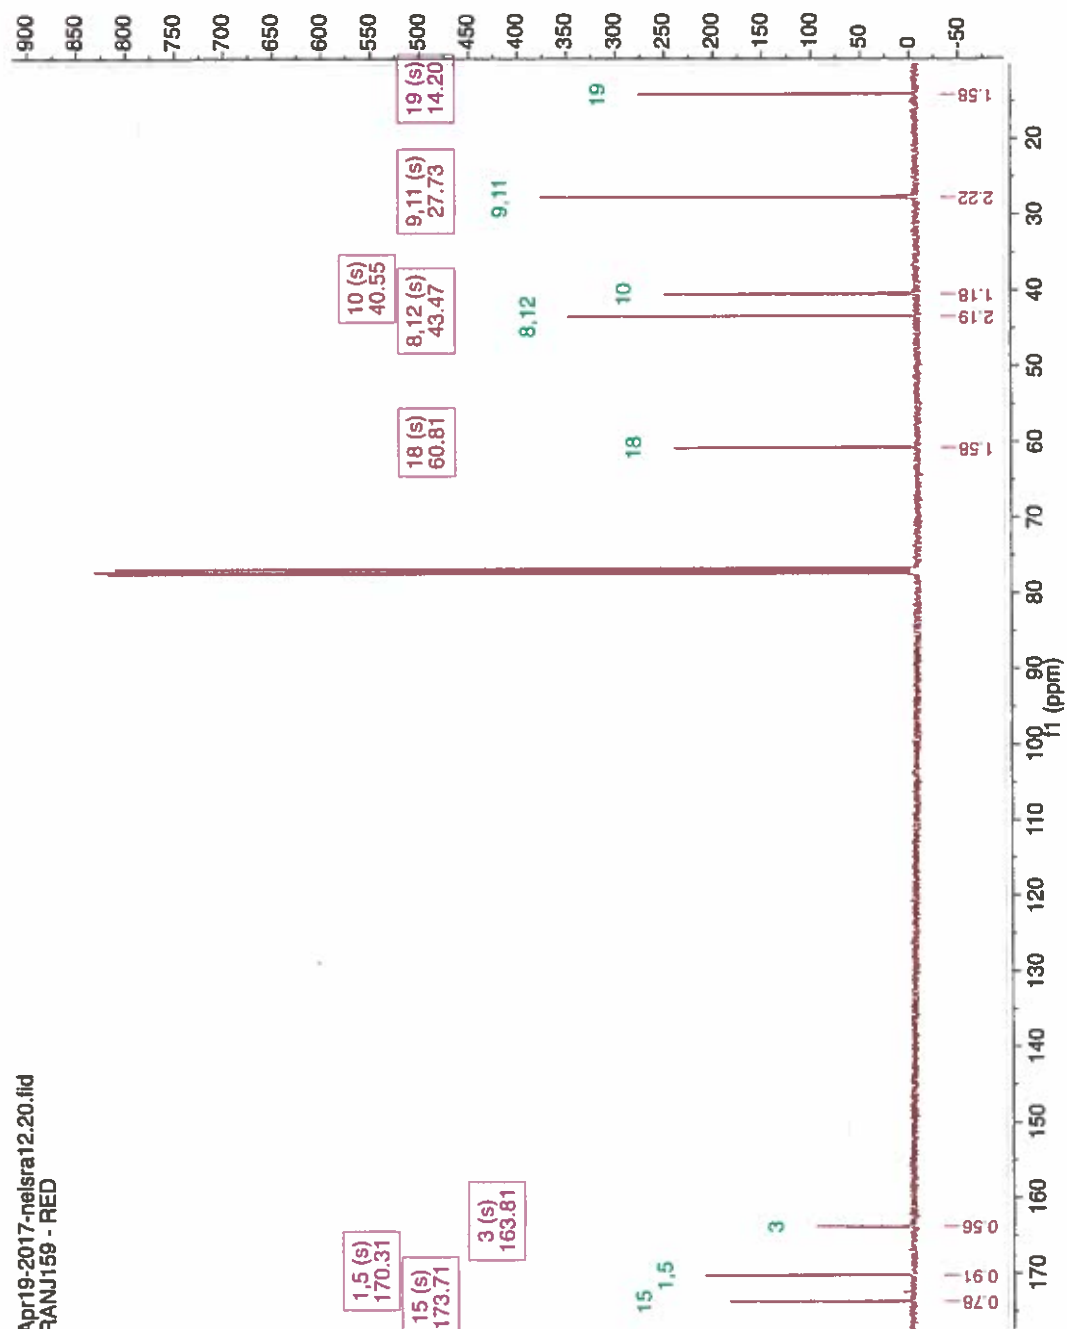

- 7.27 CDCl<sub>3</sub>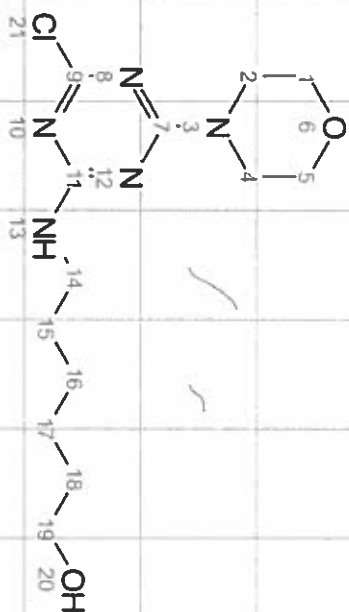

- 5.68

- 5.16

3.83

3.82

3.81

3.76

3.73

3.72

3.71

3.69

3.66

3.64

3.63

3.44

3.42

3.41

3.40

3.38

3.37

3.35

2.05

1.76

1.72

1.62

1.60

1.58 H<sub>2</sub>O1.57 H<sub>2</sub>O1.55 H<sub>2</sub>O1.54 H<sub>2</sub>O

1.42

1.41

1.40

1.39

1.38

1.37

1.36

1.26

0.00

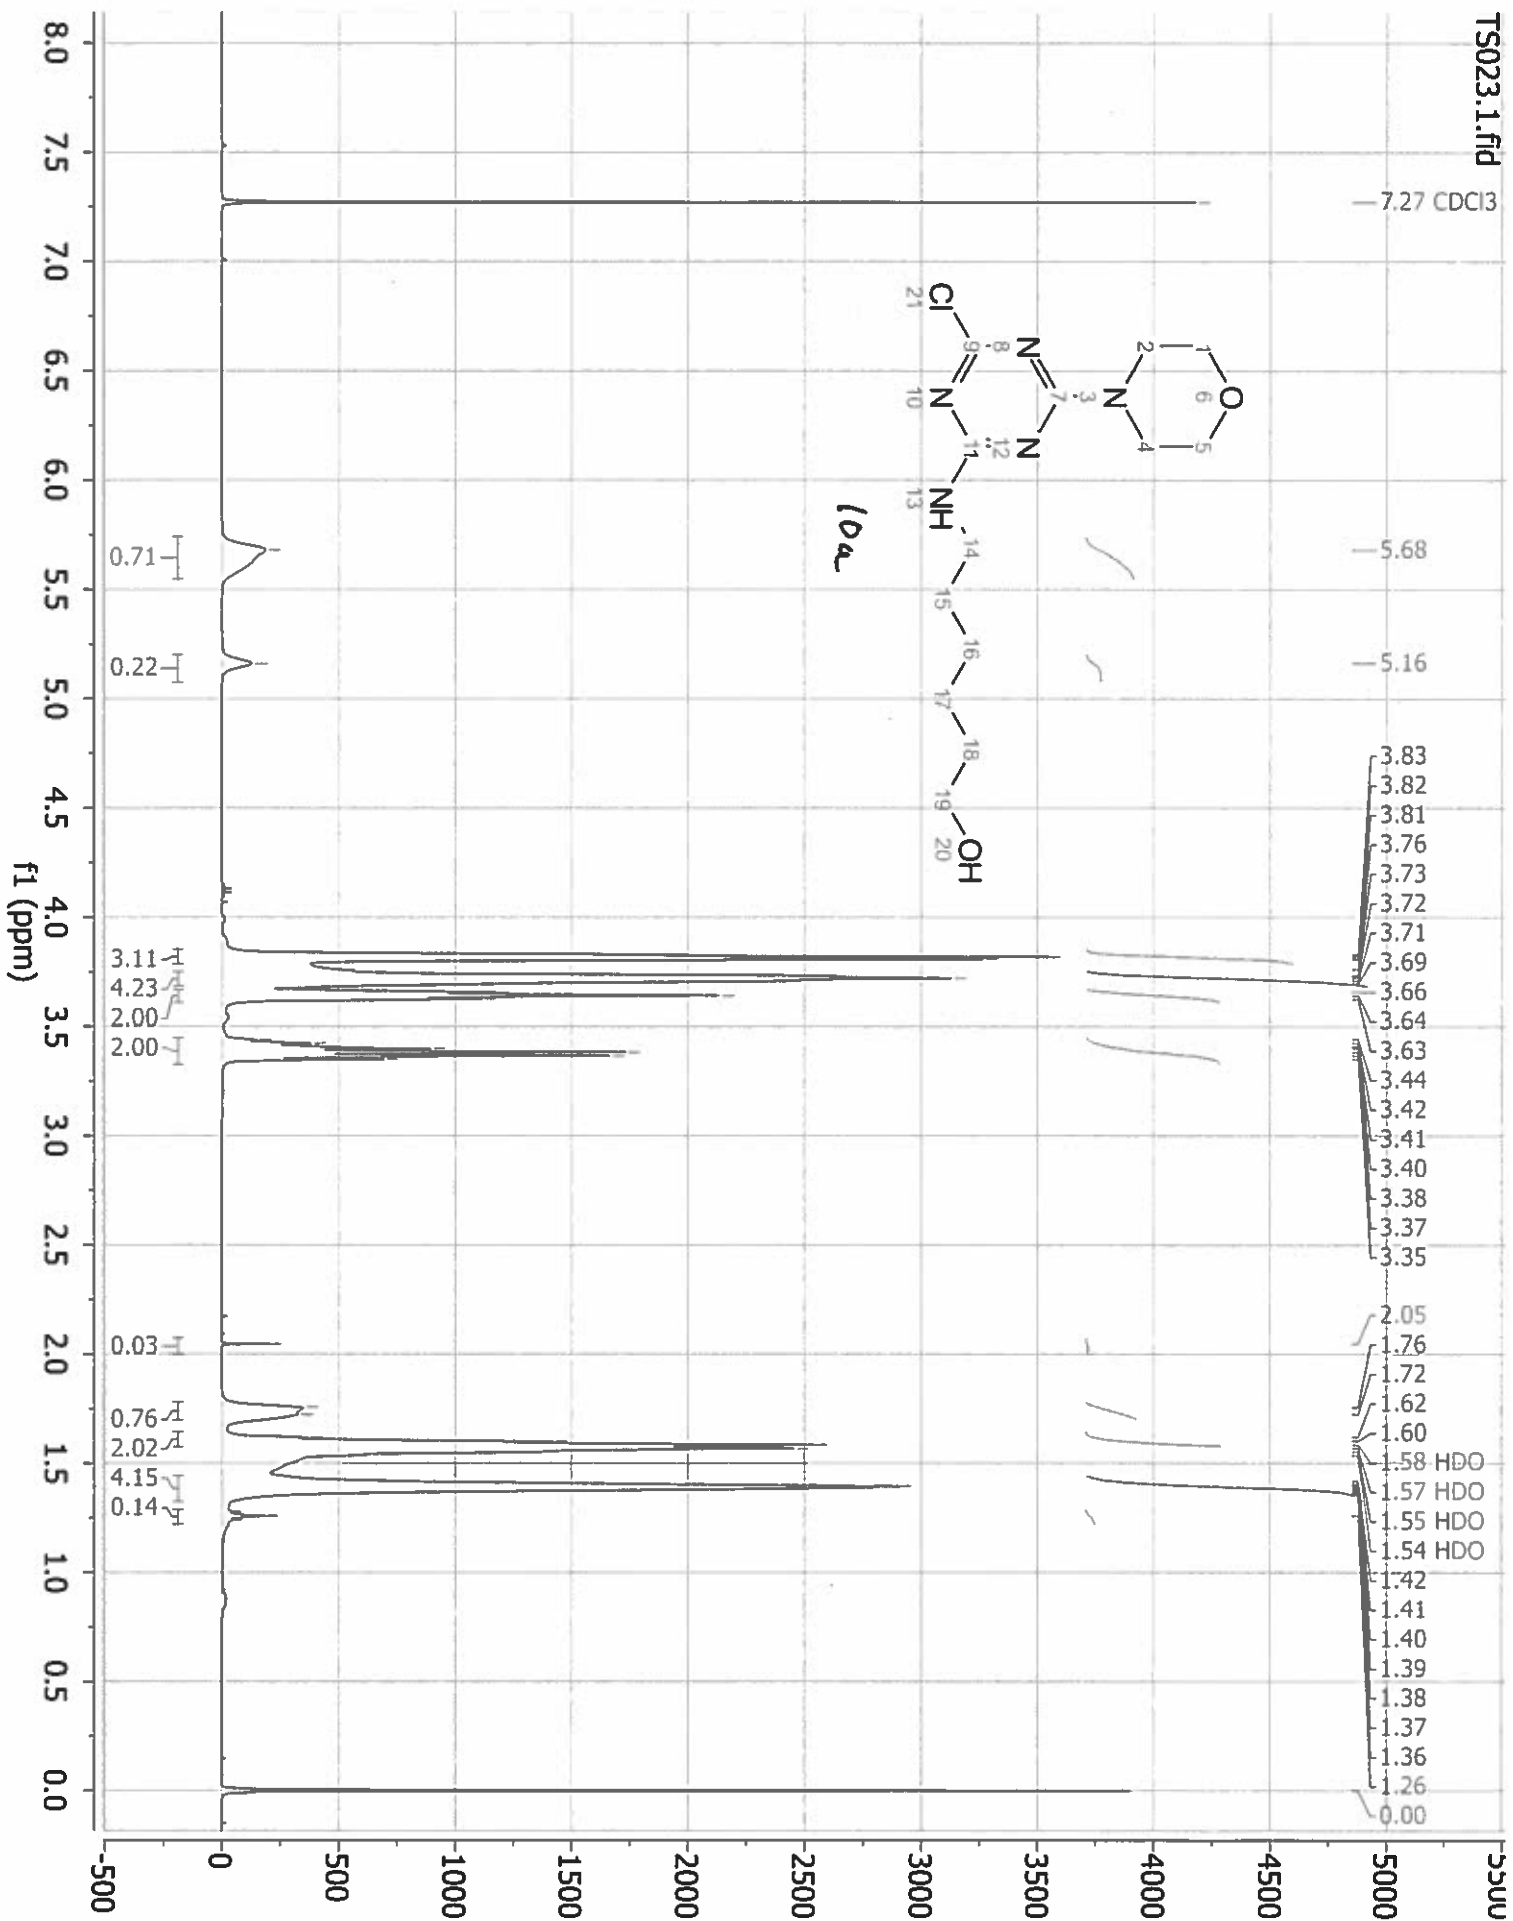

Aug02-2016-schre13.1.fid  
 second addition morpholine purified TS023  
 wfu\_C13CPD\_10k\_CDCl3 /ppv/topspin schre13.7

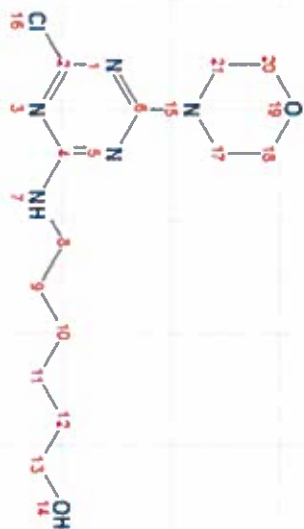

10a

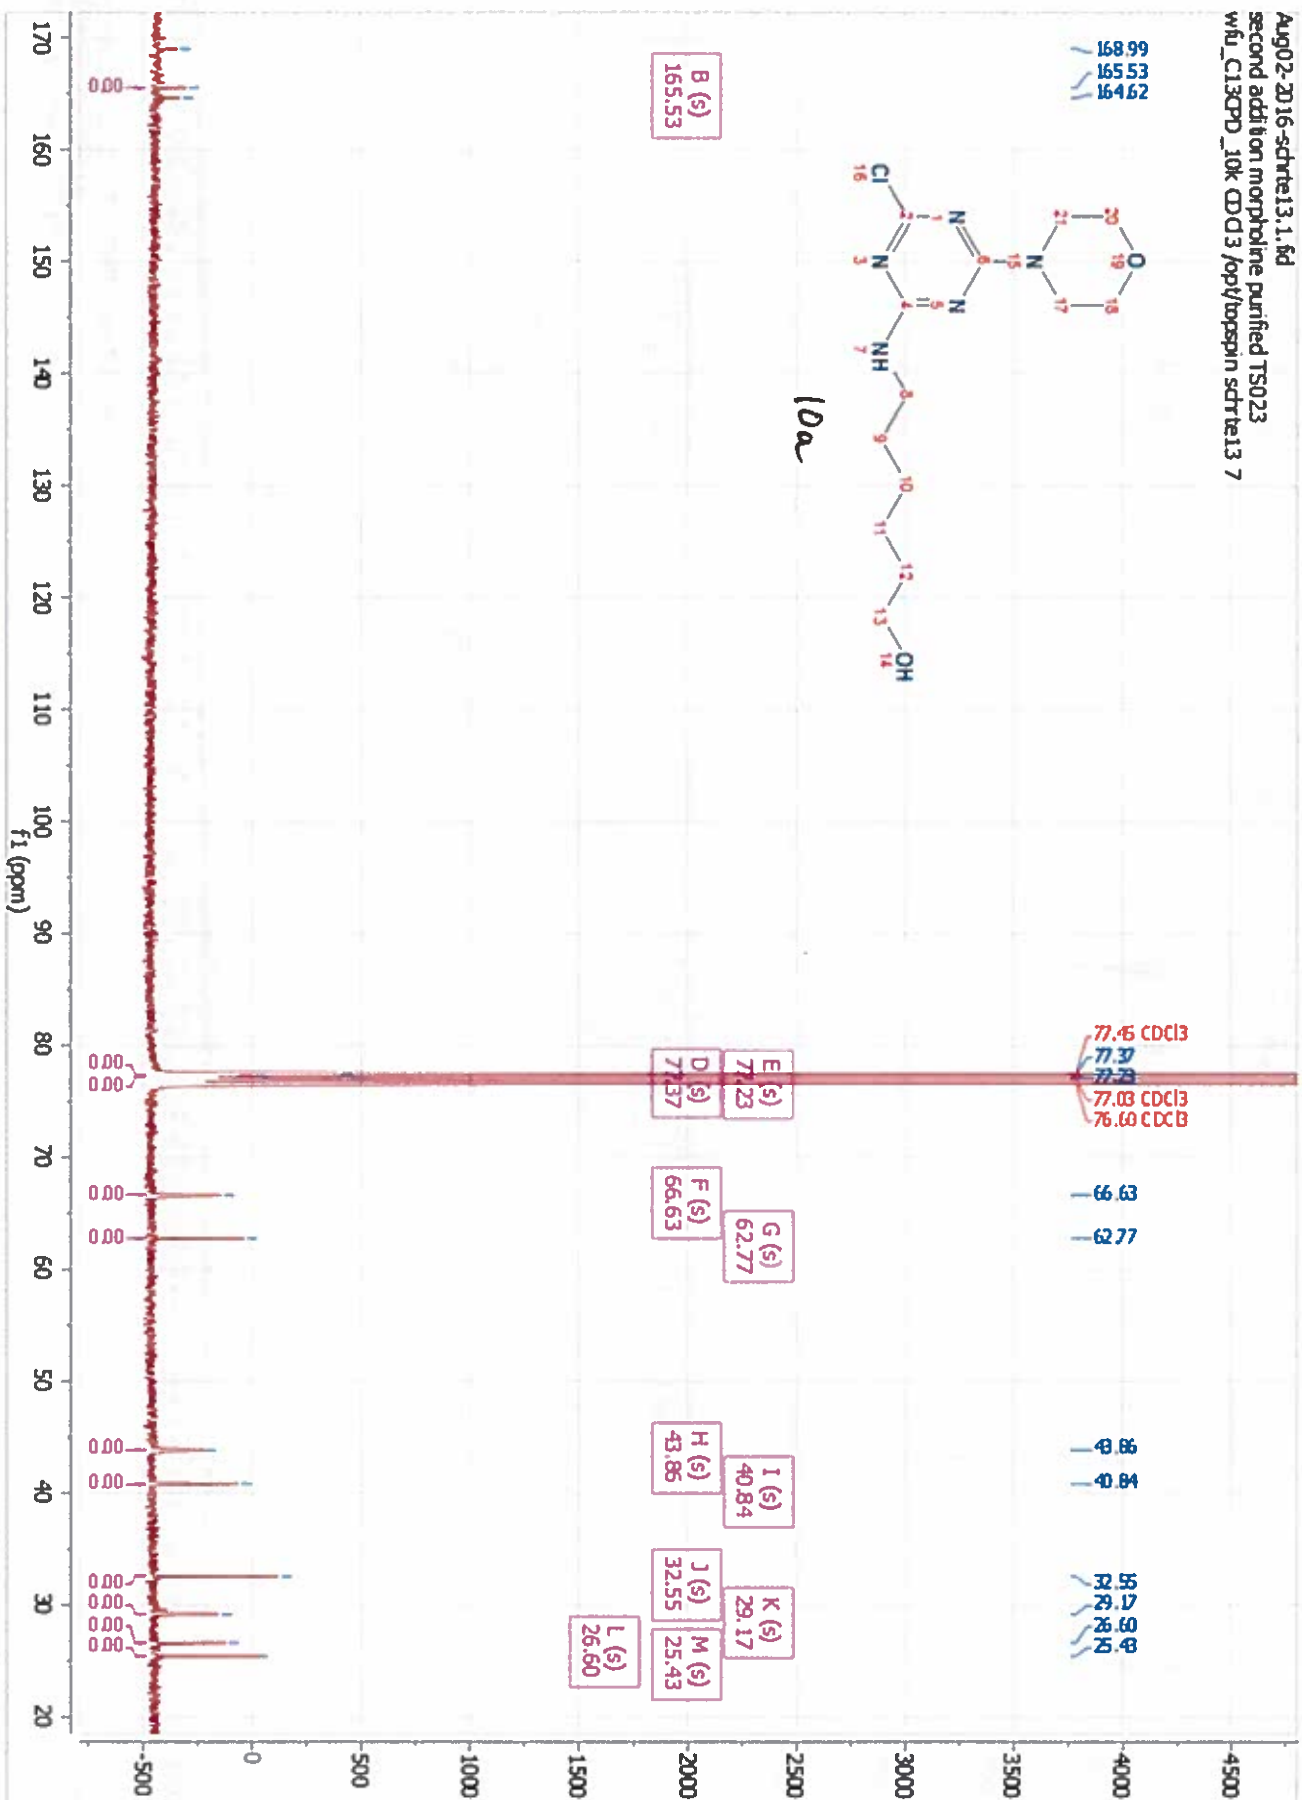

1H NMR spectrum (400 MHz, DMF-d7) of compound 12. The spectrum shows several peaks with the following chemical shifts and integrations:

| Peak Label | Chemical Shift (ppm) | Integration |
|------------|----------------------|-------------|
| B (g)      | 7.29                 | 1.00        |
| E (h)      | 5.92                 | 0.99        |
| H (i)      | 4.69                 | 2.00        |
| J (i)      | 3.79                 | 2.00        |
| K (i)      | 3.69                 | 2.00        |

Solvent peaks for DMF are visible at approximately 2.7 and 2.9 ppm.



**methyl 4-(((4-chloro-6-morpholino-1,3,5-triazin-2-yl)amino)methyl)benzoate, 10c.**

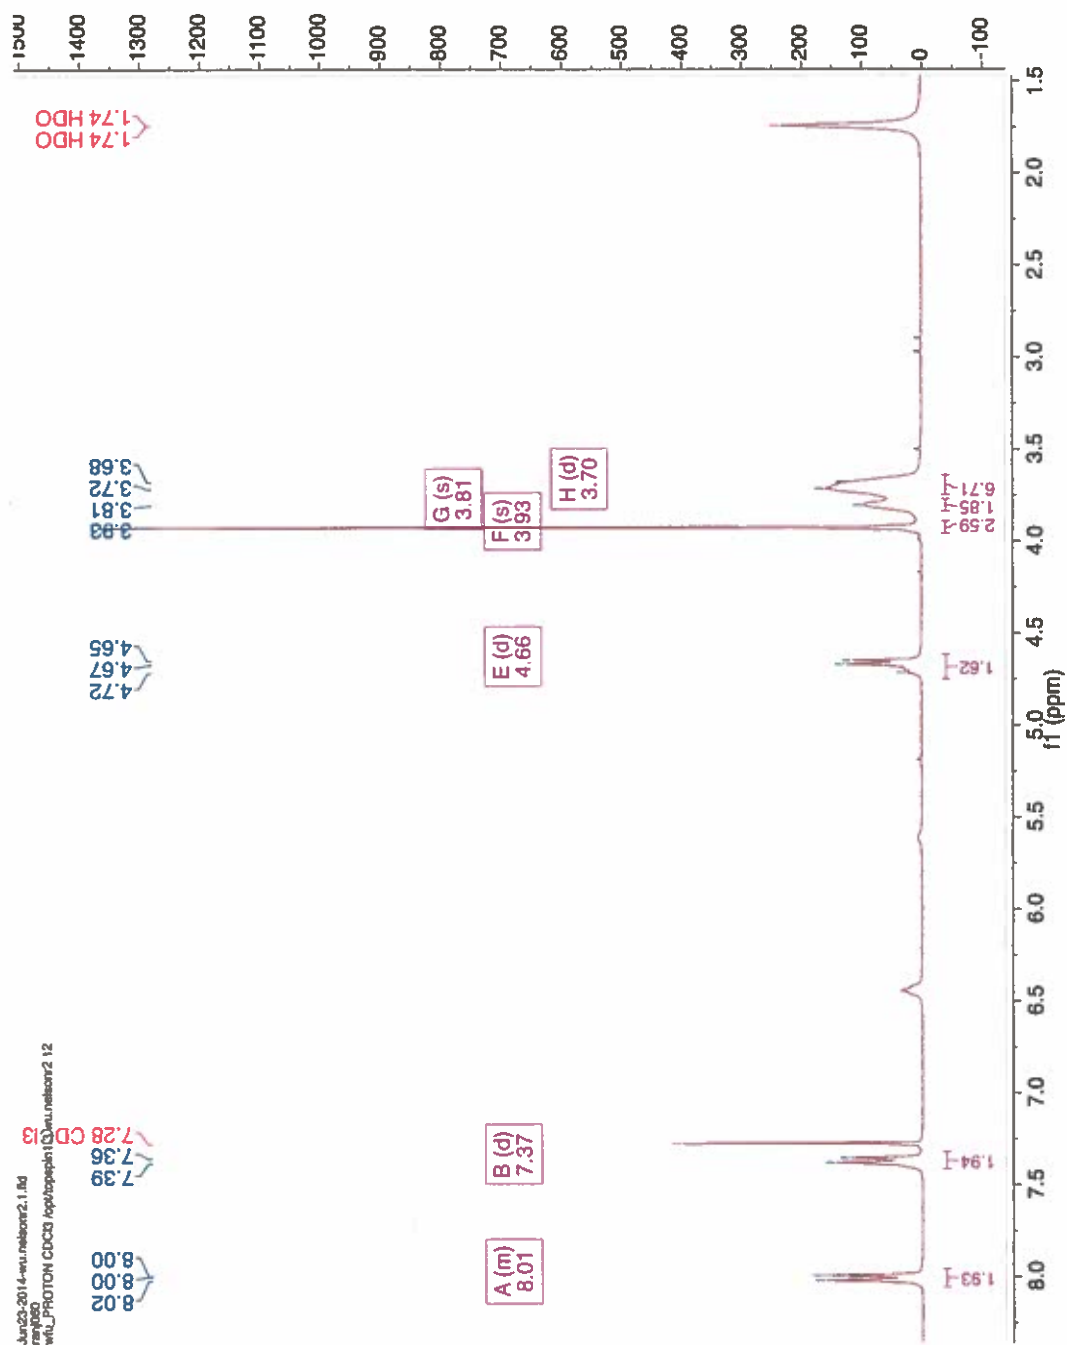

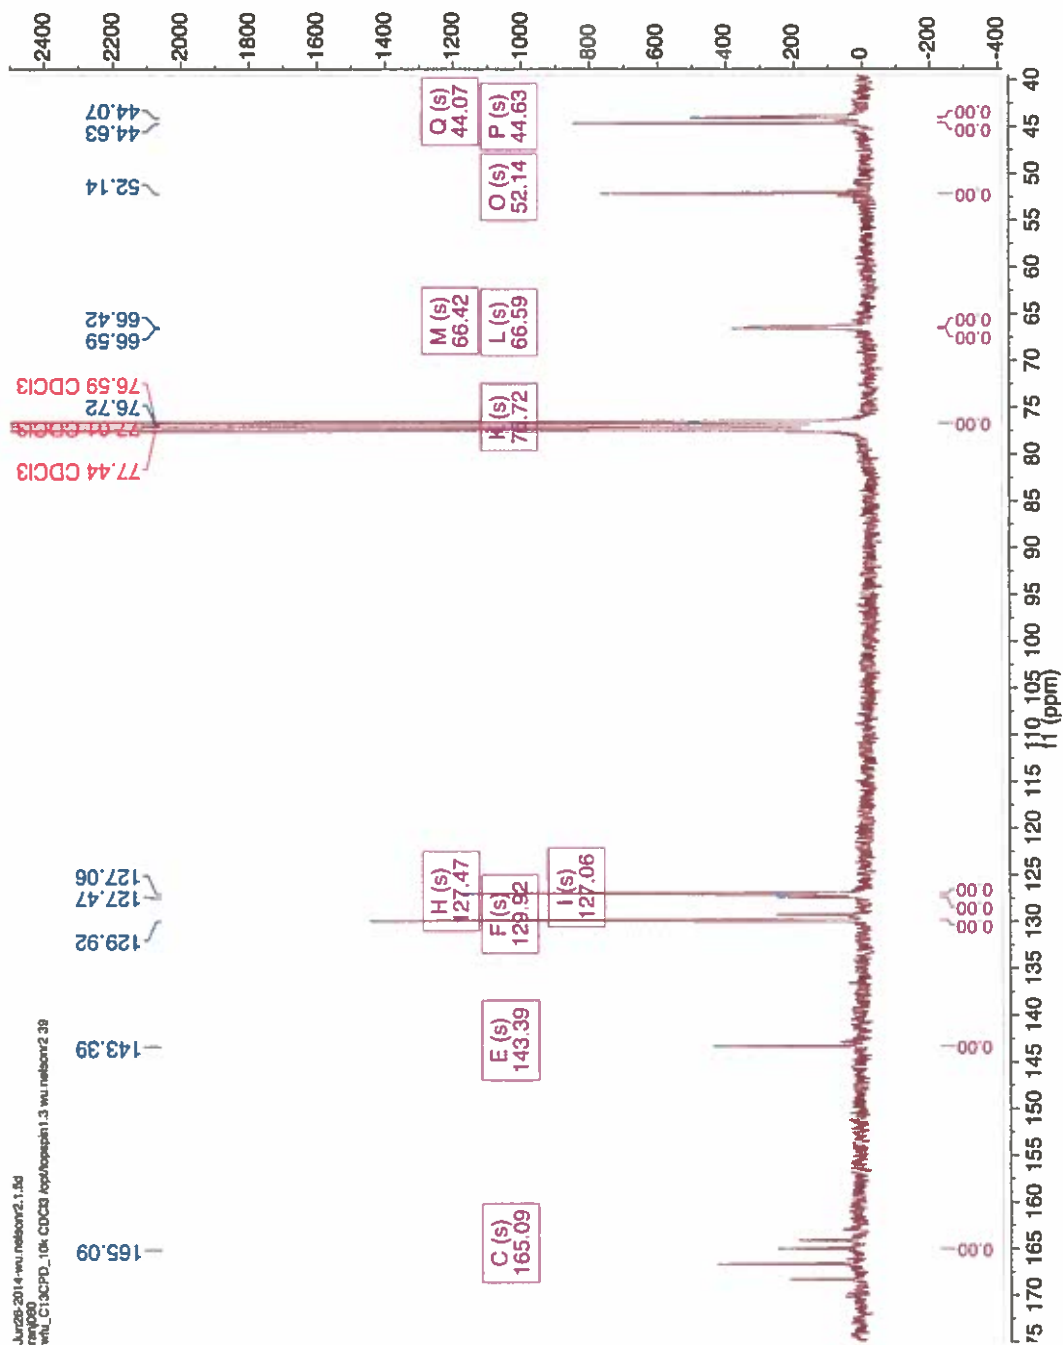

**10d.**

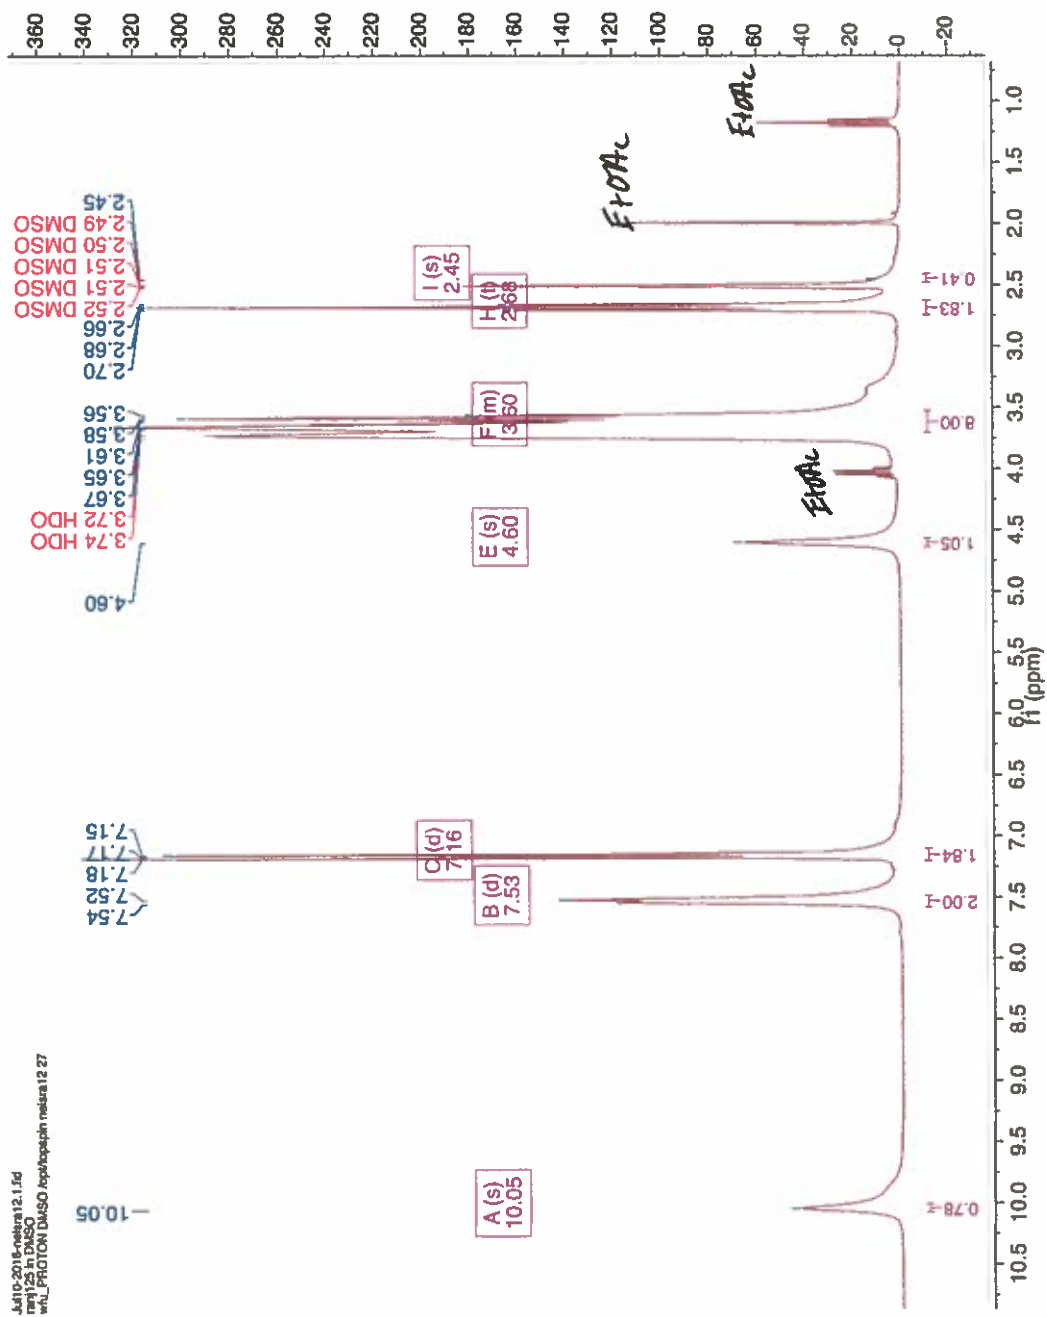

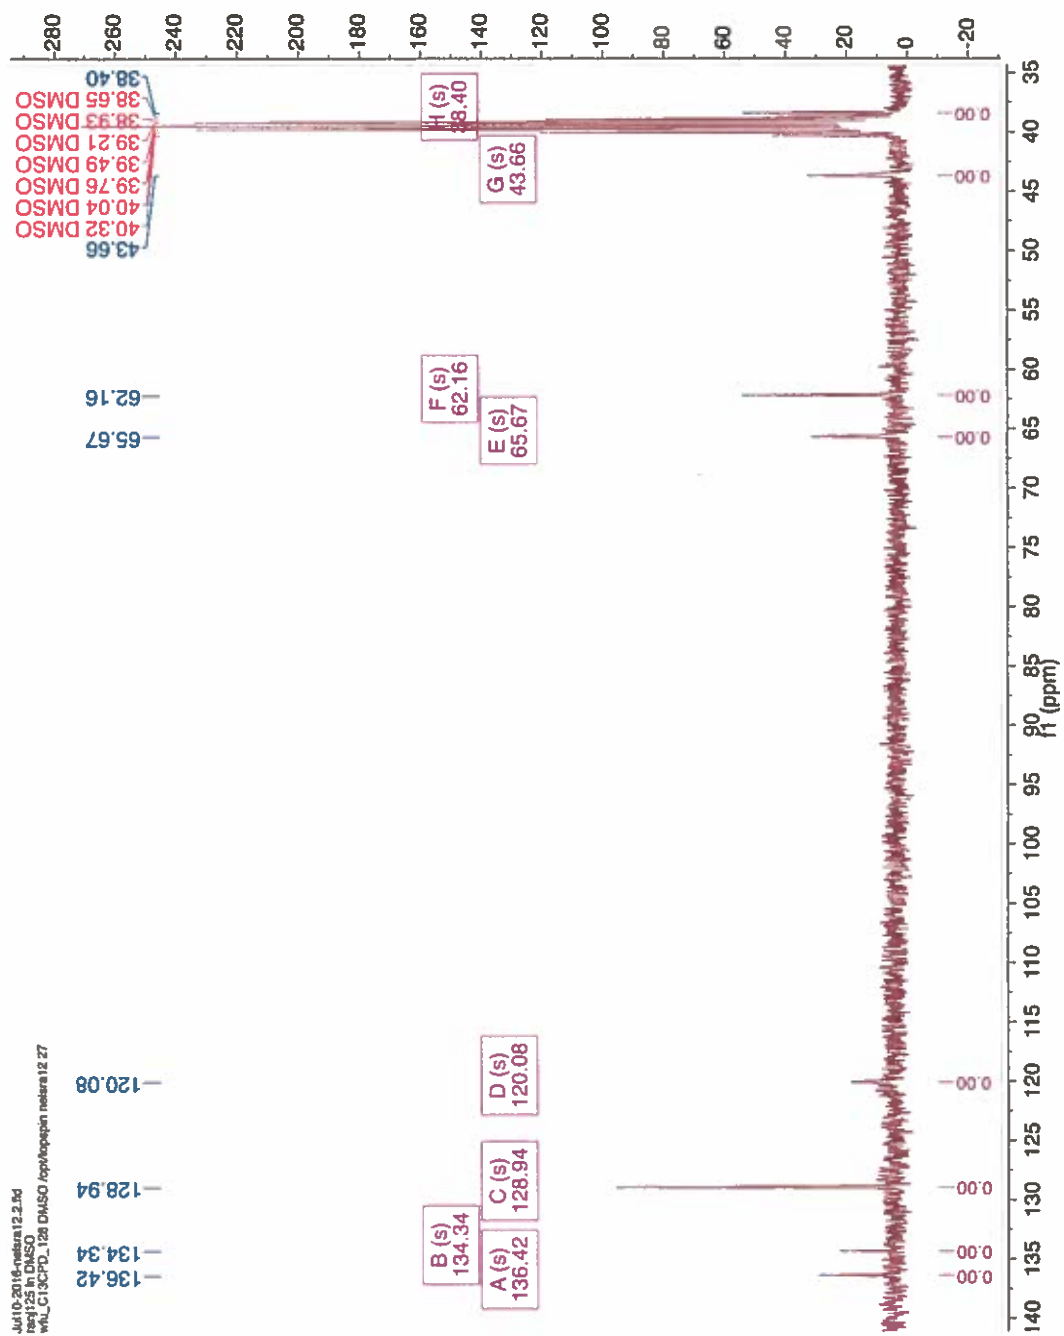

Jul10-2016-nelara12.5d  
 nel125 in DMSO  
 WIL\_C13CPD\_128 DMSO /pp/ktopapin nelara12.27

**ethyl 1-(4-chloro-6-((4-(2-hydroxyethyl)phenyl)amino)-1,3,5-triazin-2-yl)pi-  
peridine-4-carboxylate, 10e.**

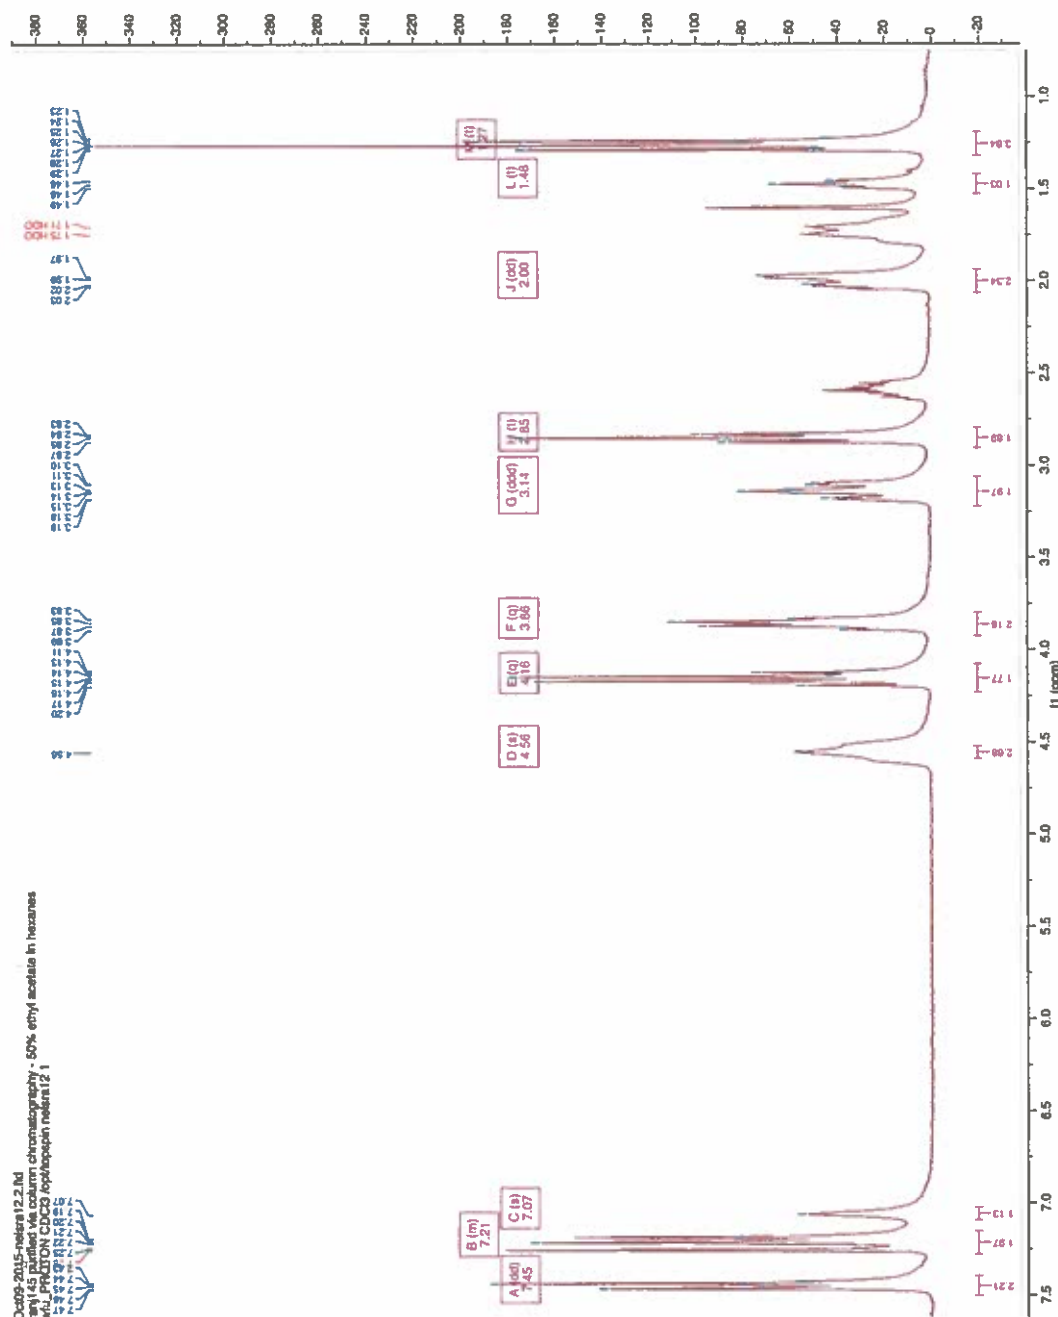

Oct09-2015-nelera12.2.fid  
 run145 purified via column chromatography - 50% ethyl acetate in hexanes  
 w/1 PR10TON CDCl3 /ophtopapn nelera12.1

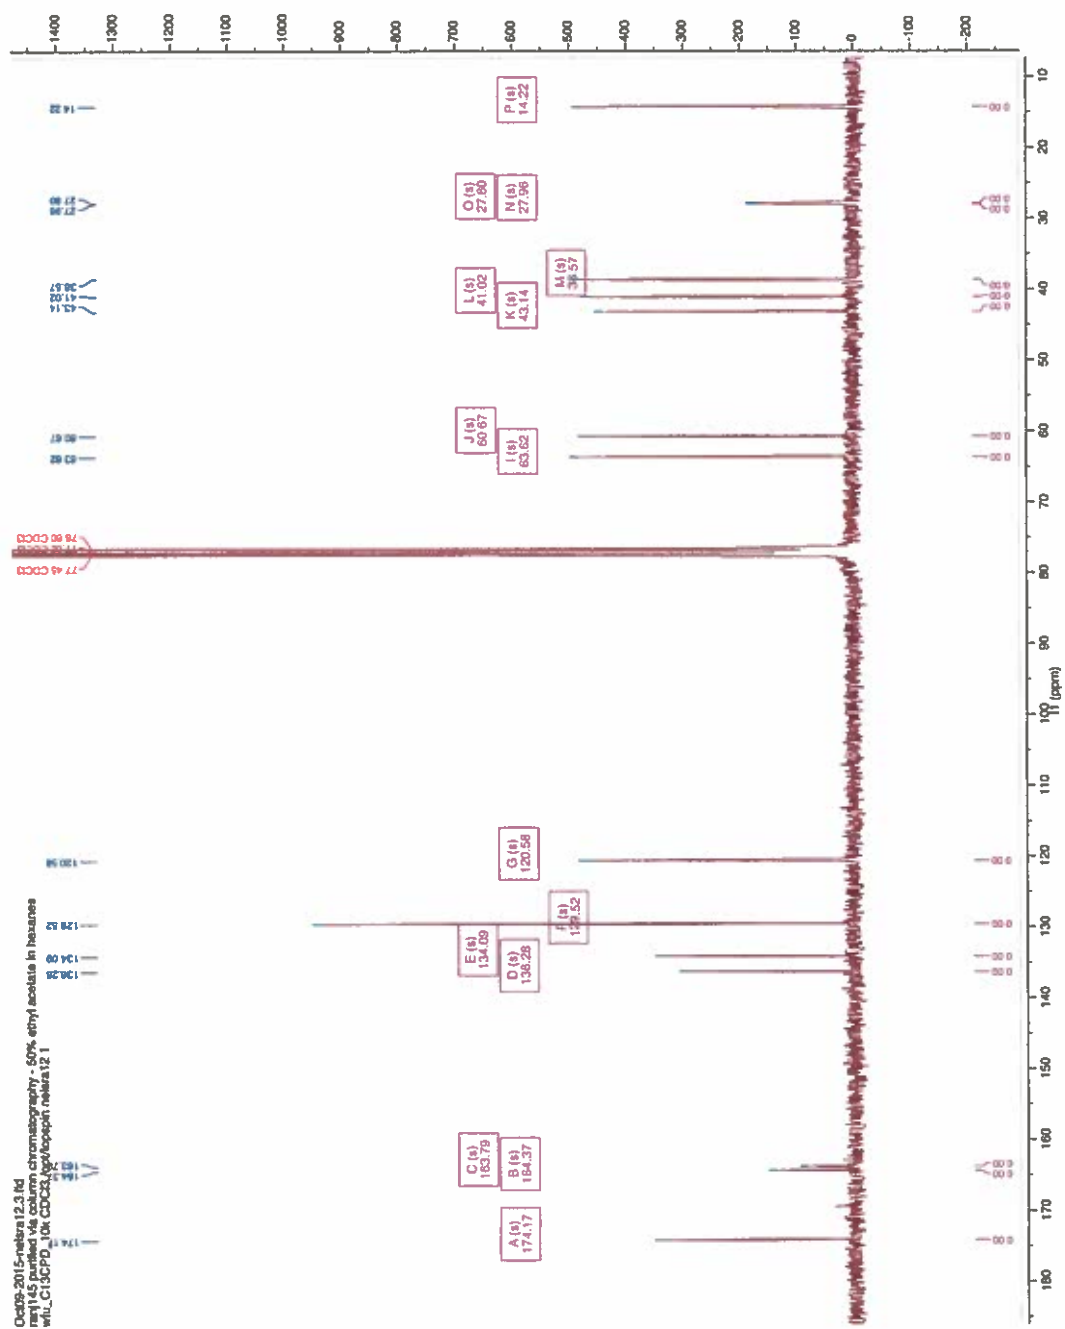

121.72  
118.58

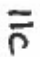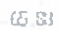

(0.5)

43.07

10.27 DMSO

39.99 DM50  
70.71 DM50

39.1 DMSO  
39.4 DMSO

39.16 DMSO

30.60 DM50

2.3

233

29.24  
32.75

35.2

34

2387

Sep12-2016-schrie13.1.fid  
 TS028 third addition purified  
 wfu\_PROTON DMSO /op/topspin schrie13.25

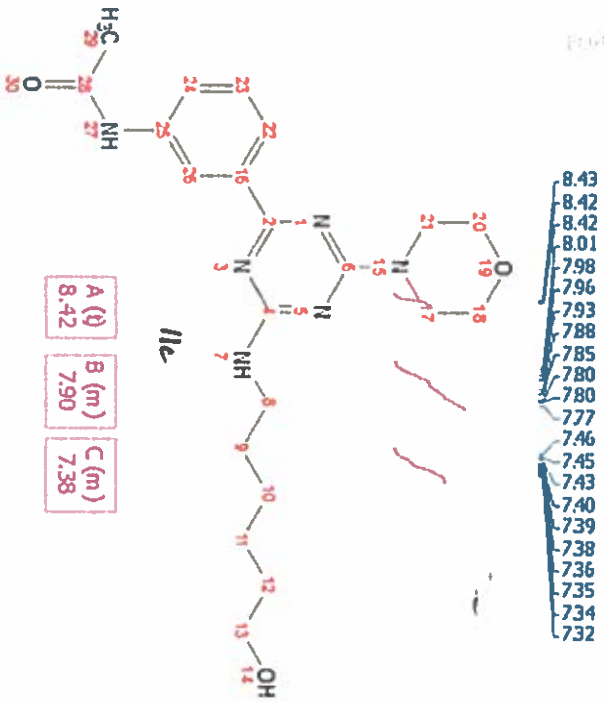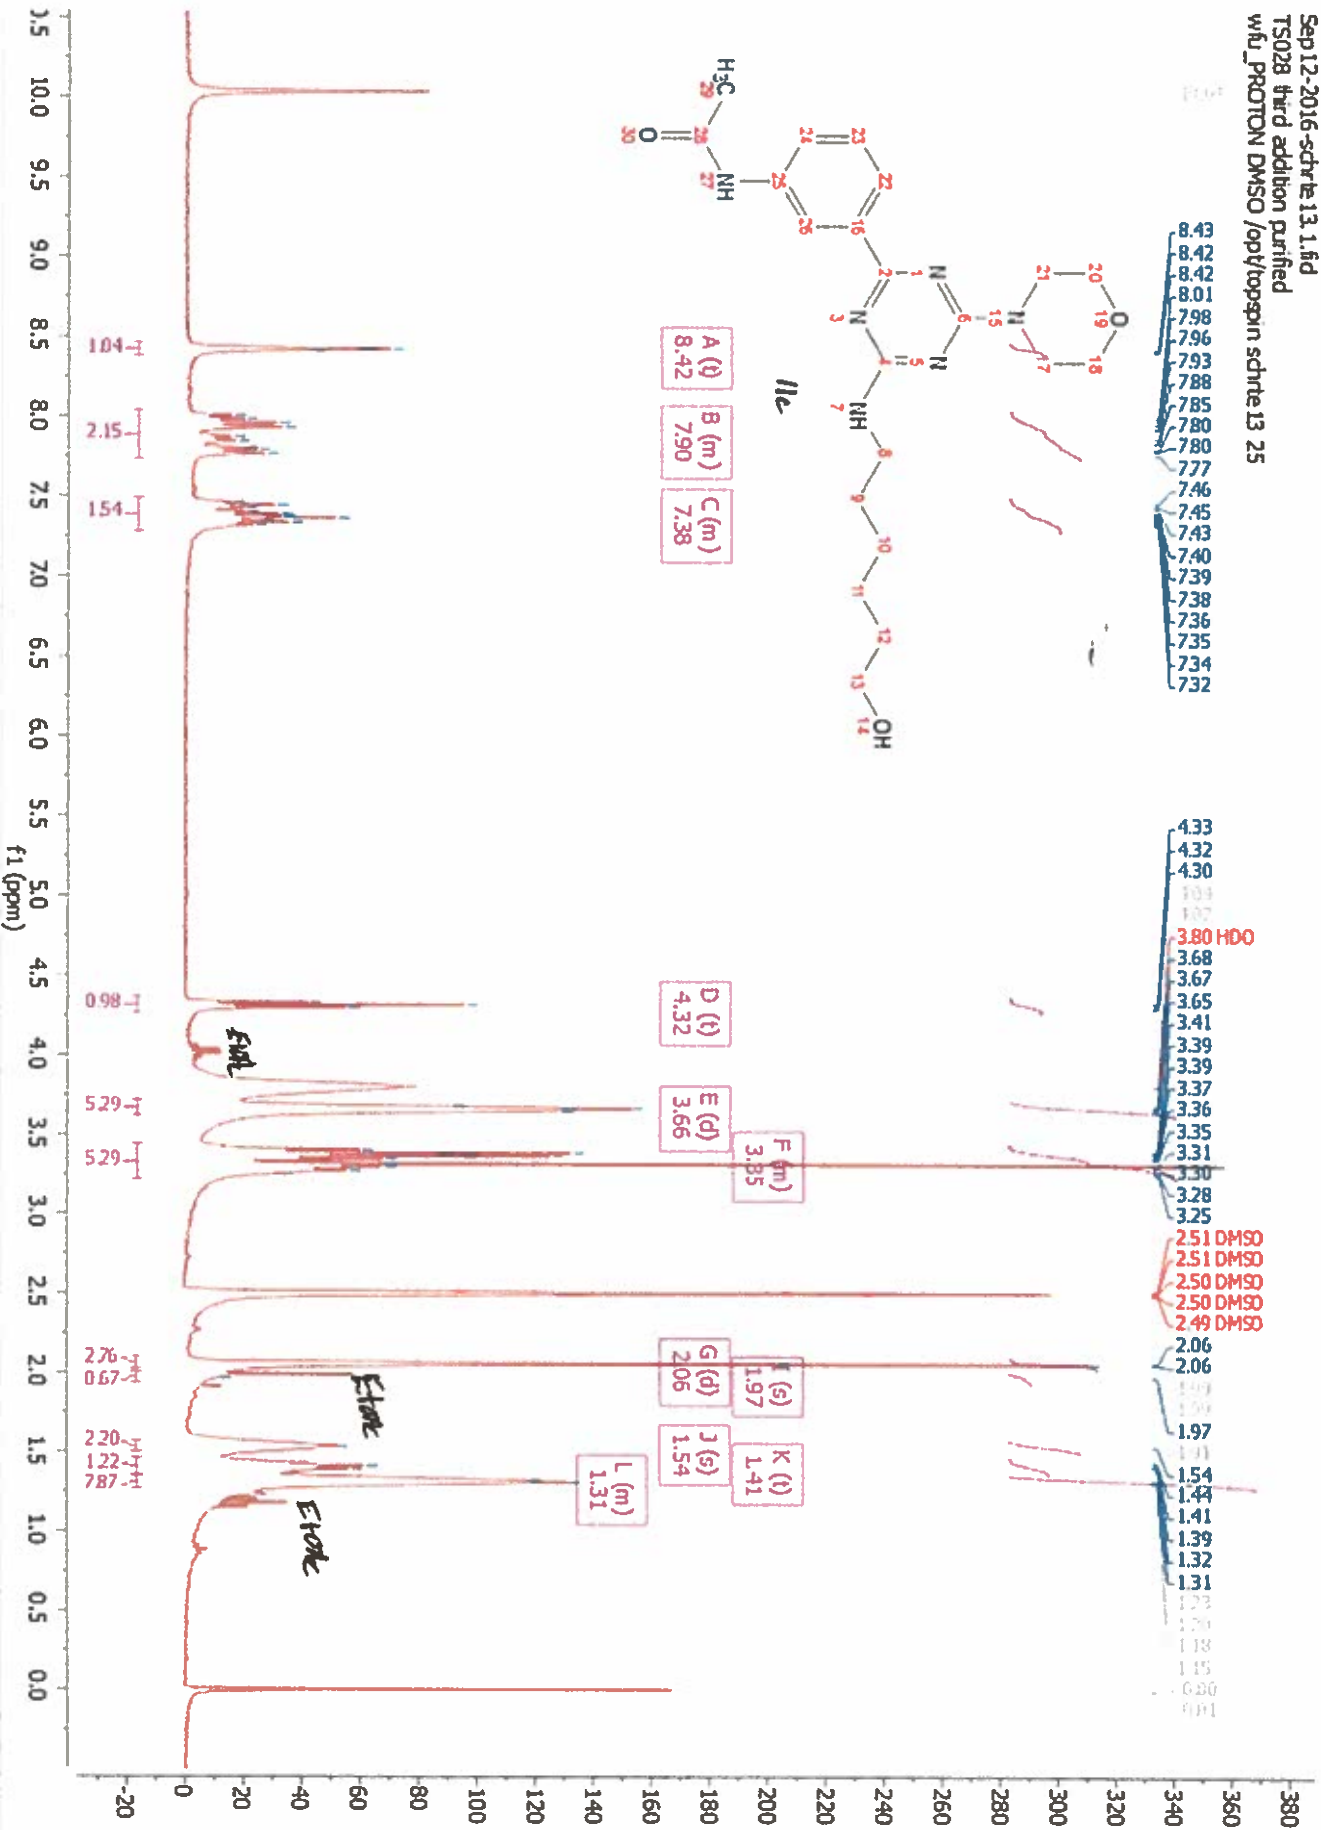



**methyl 4-(((4-(2-aminopyrimidin-5-yl)-6-morpholino-1,3,5-triazin-2-yl)amino)methyl)benzoate, 12.**

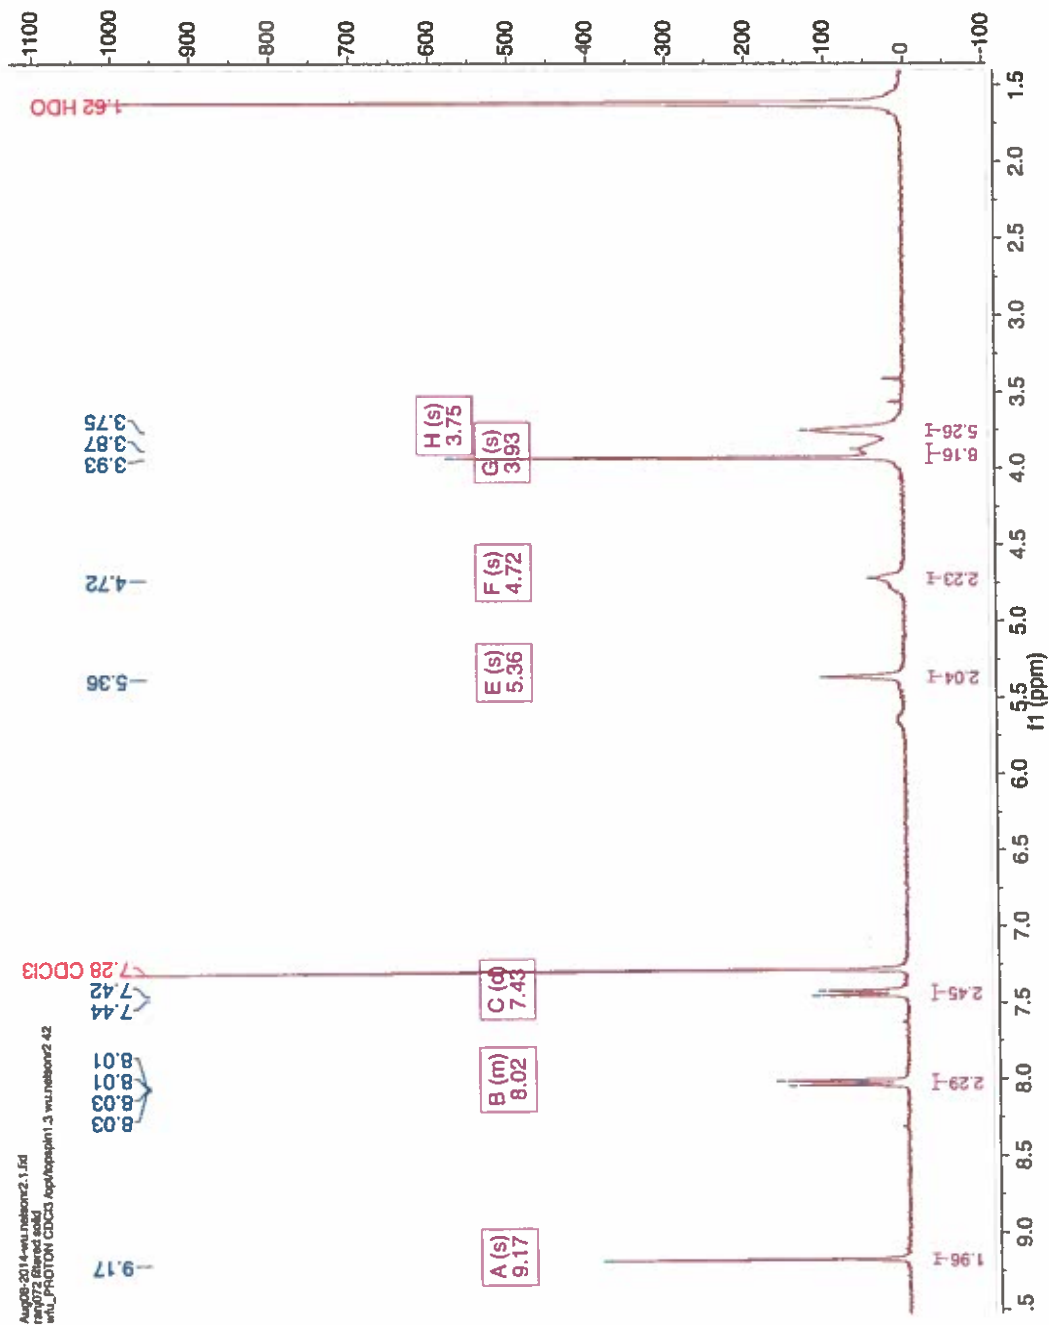

2-((4-((2-aminopyrimidin-5-yl)-6-morpholino-1,3,5-triazin-2-yl)amino)phenyl)ethan-1-ol, 13a.

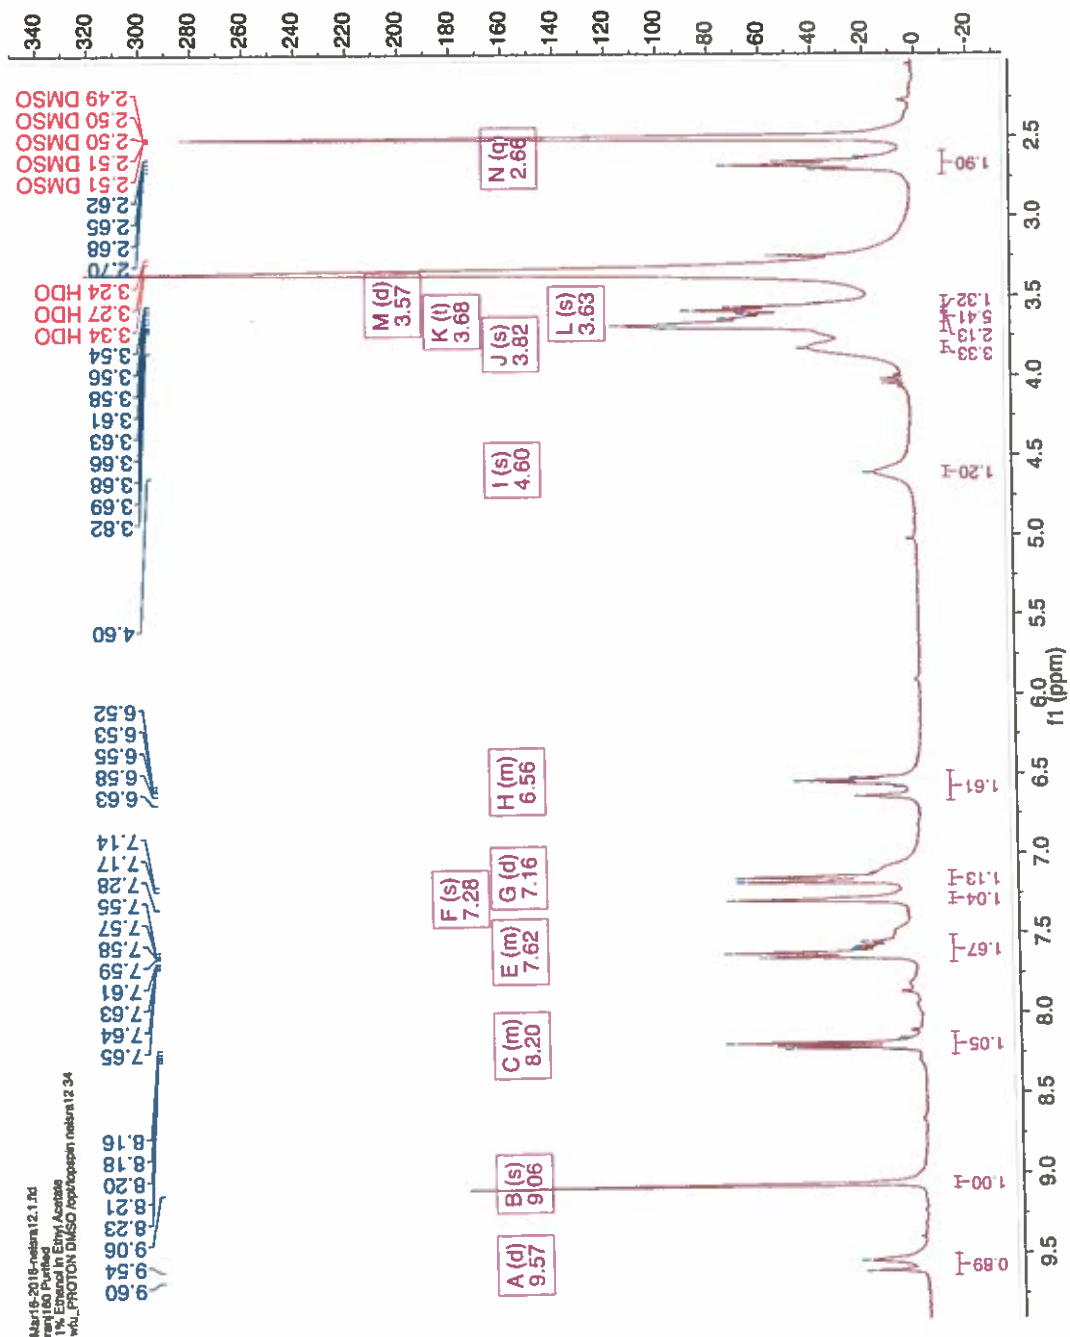

2-4-((4-(4-aminophenyl)-6-morpholino-1,3,5-triazin-2-yl)amino)phenyl)ethan-1-ol, 13b.

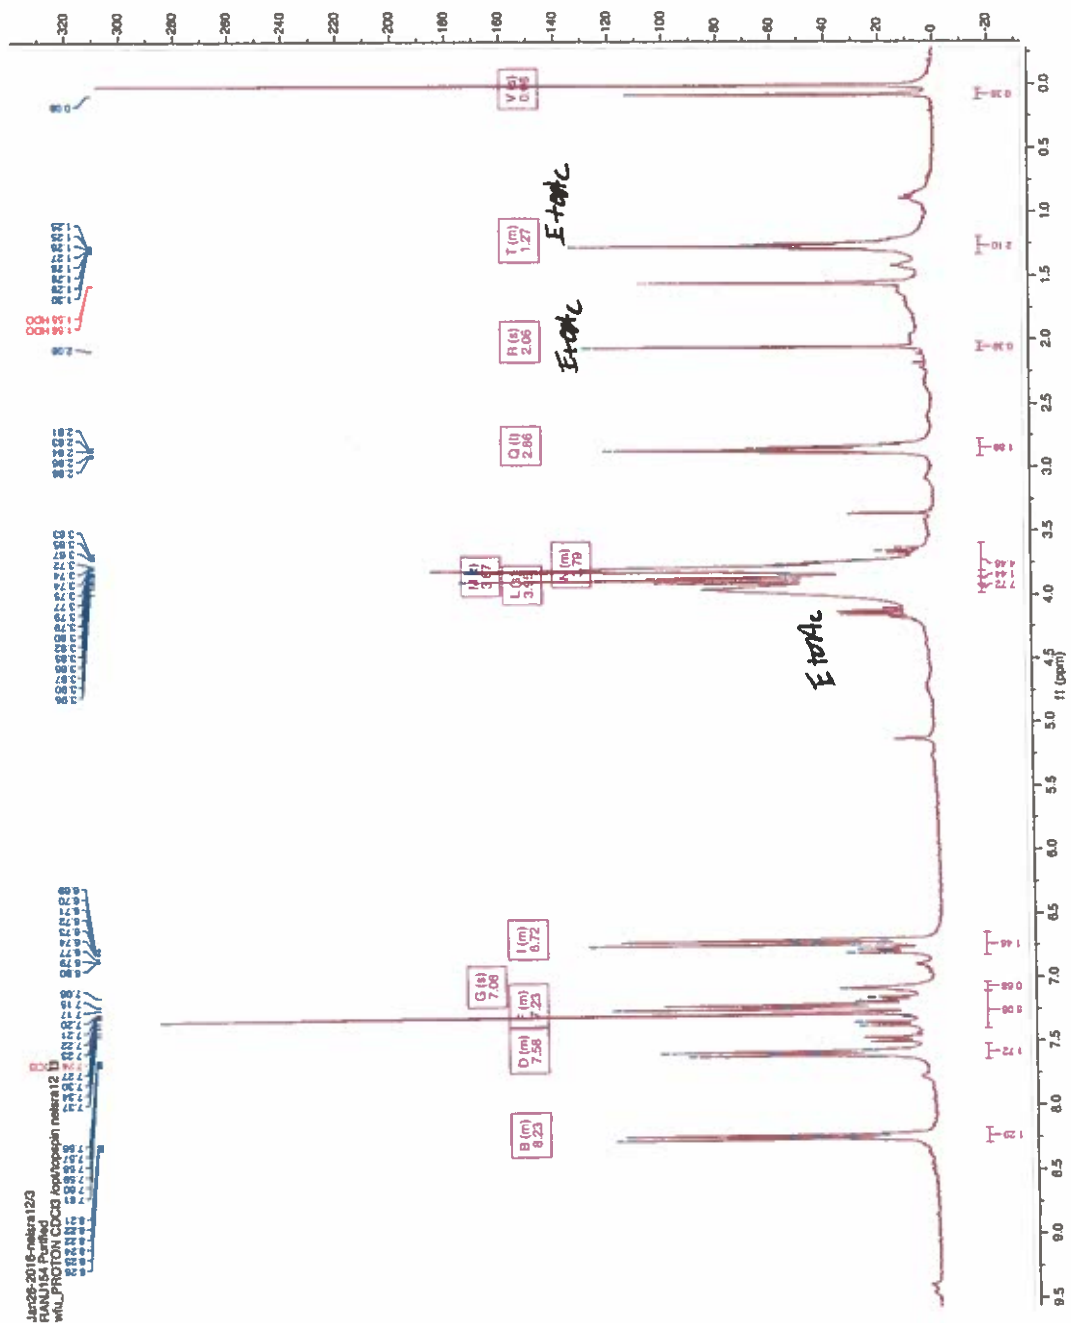

***tert*-butyl (5-(4-((4-(2-hydroxyethyl)phenyl)amino)-6-morpholino-1,3,5-triazin-2-yl)pyrimidin-2-yl)carbamate, 13c.**

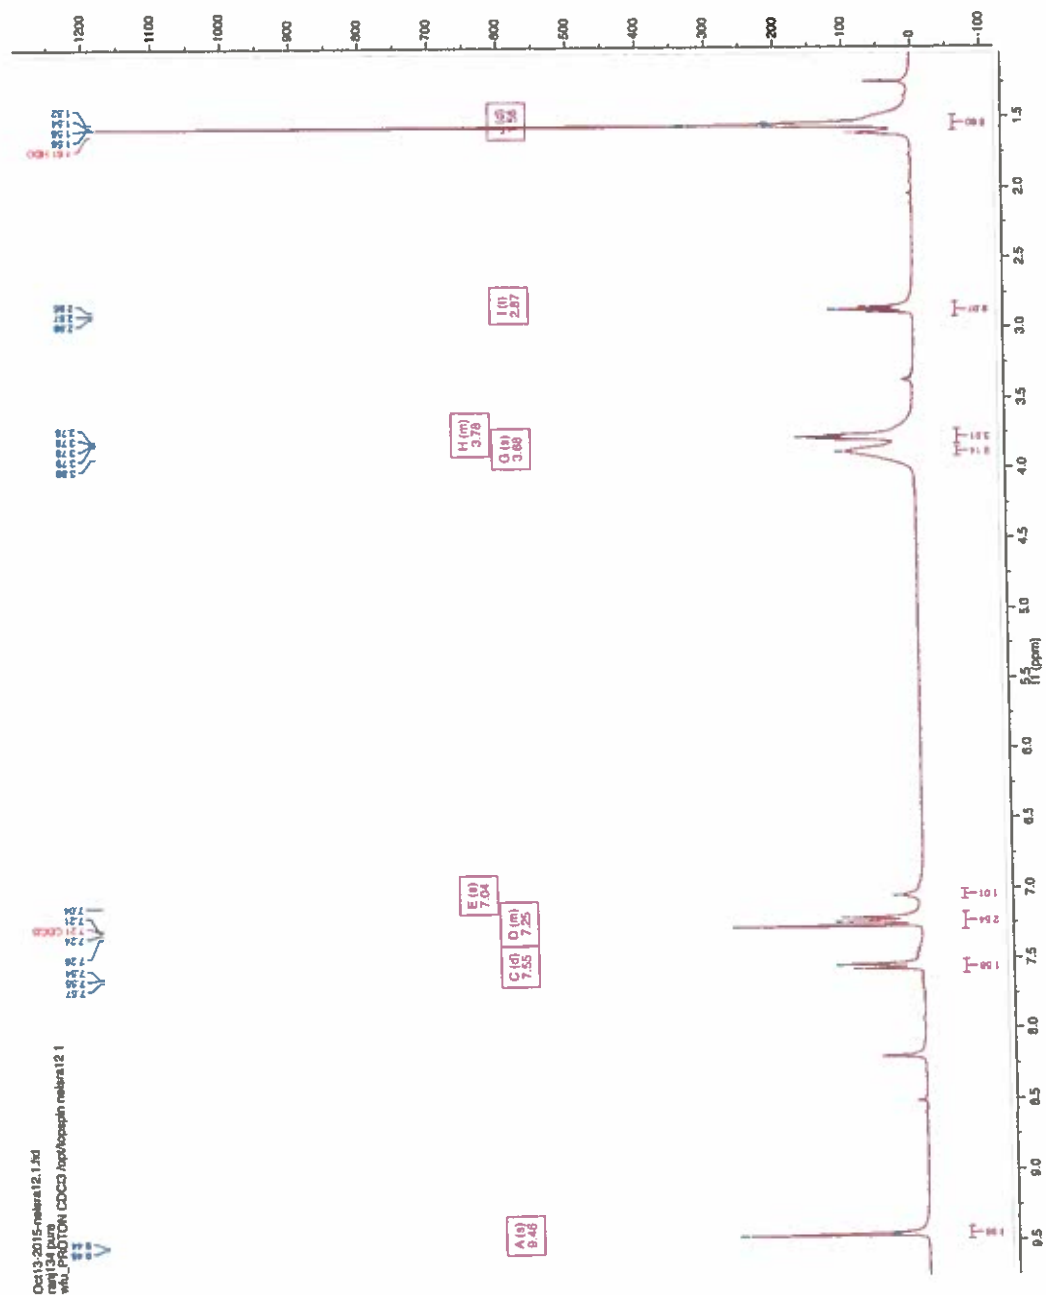

**yl)amino)phenyl)ethan-1-ol, 13d.**

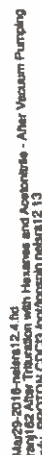

2-(4-((4-morpholino-6-(6-(trifluoromethyl)pyridin-3-yl)-1,3,5-triazin-2-yl)amino)phenyl)ethan-1-ol, 13f.

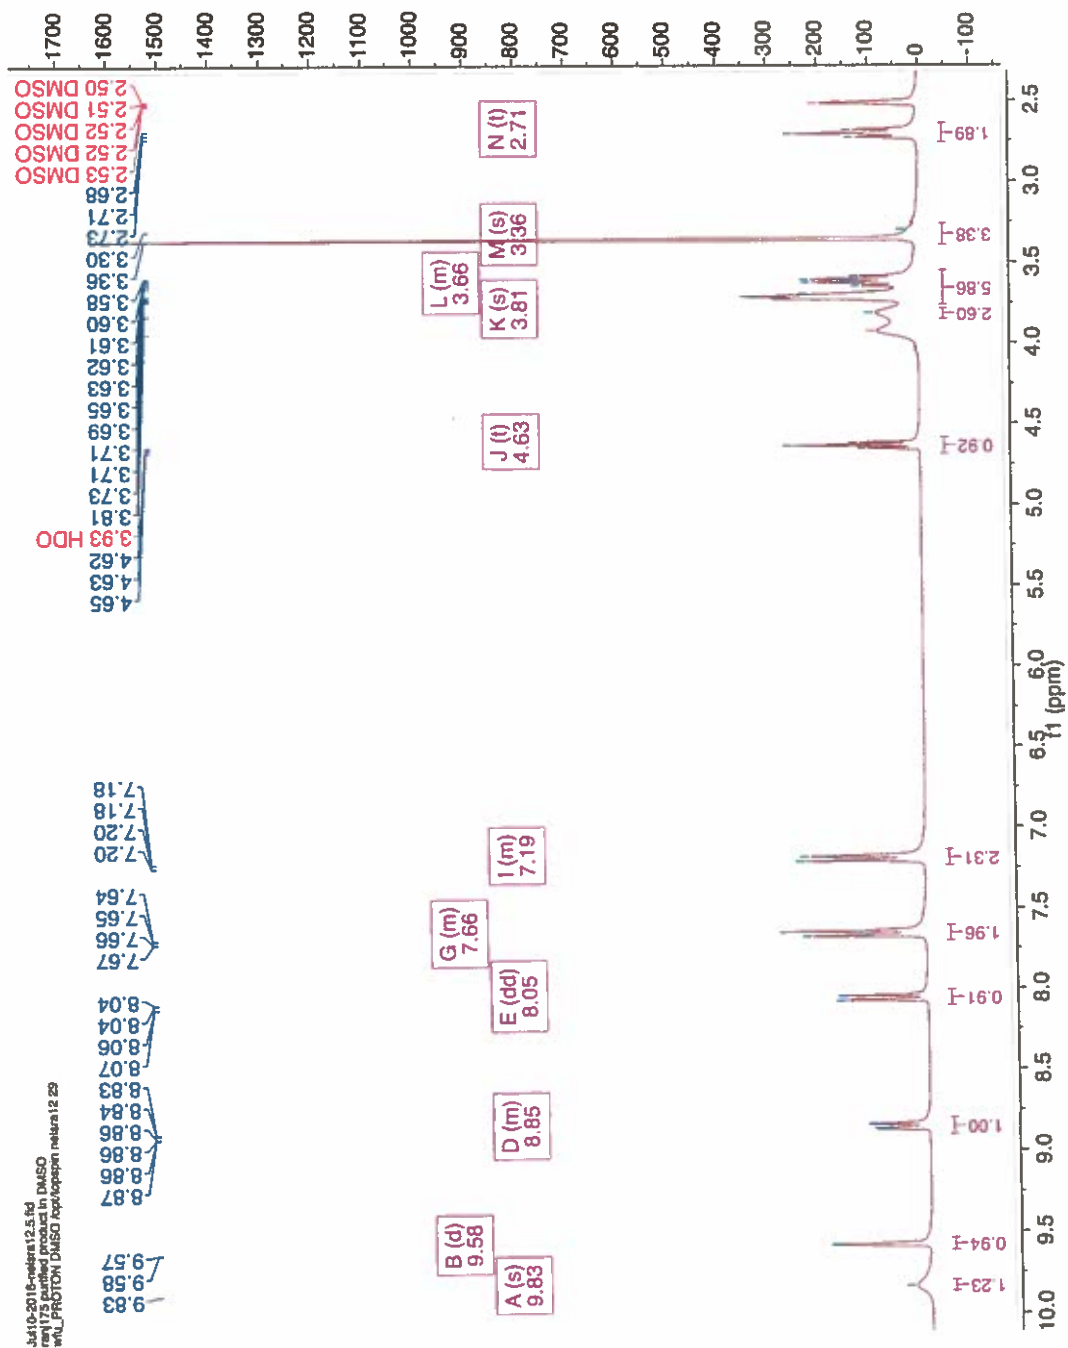



***N*-(4-(4-((4-(2-hydroxyethyl)phenyl)amino)-6-morpholino-1,3,5-triazin-2-yl)phenyl)acetamide, 13h.**

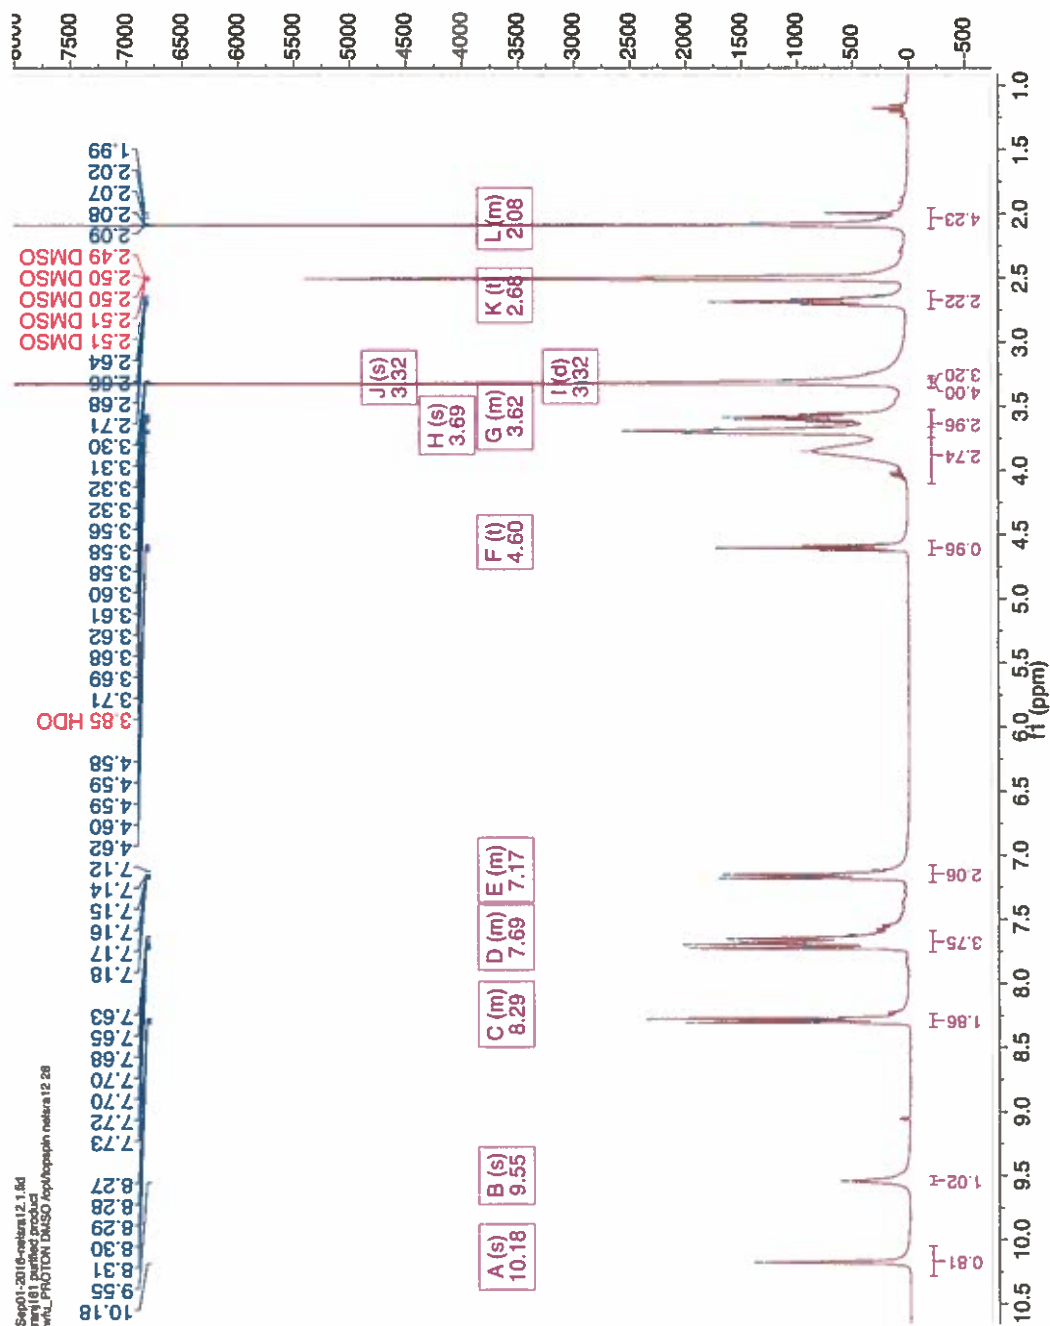





4-((4-chloro-6-morpholino-1,3,5-triazin-2-yl)amino)phenethyl (tert-butoxycarbonyl)leucinate, 14.

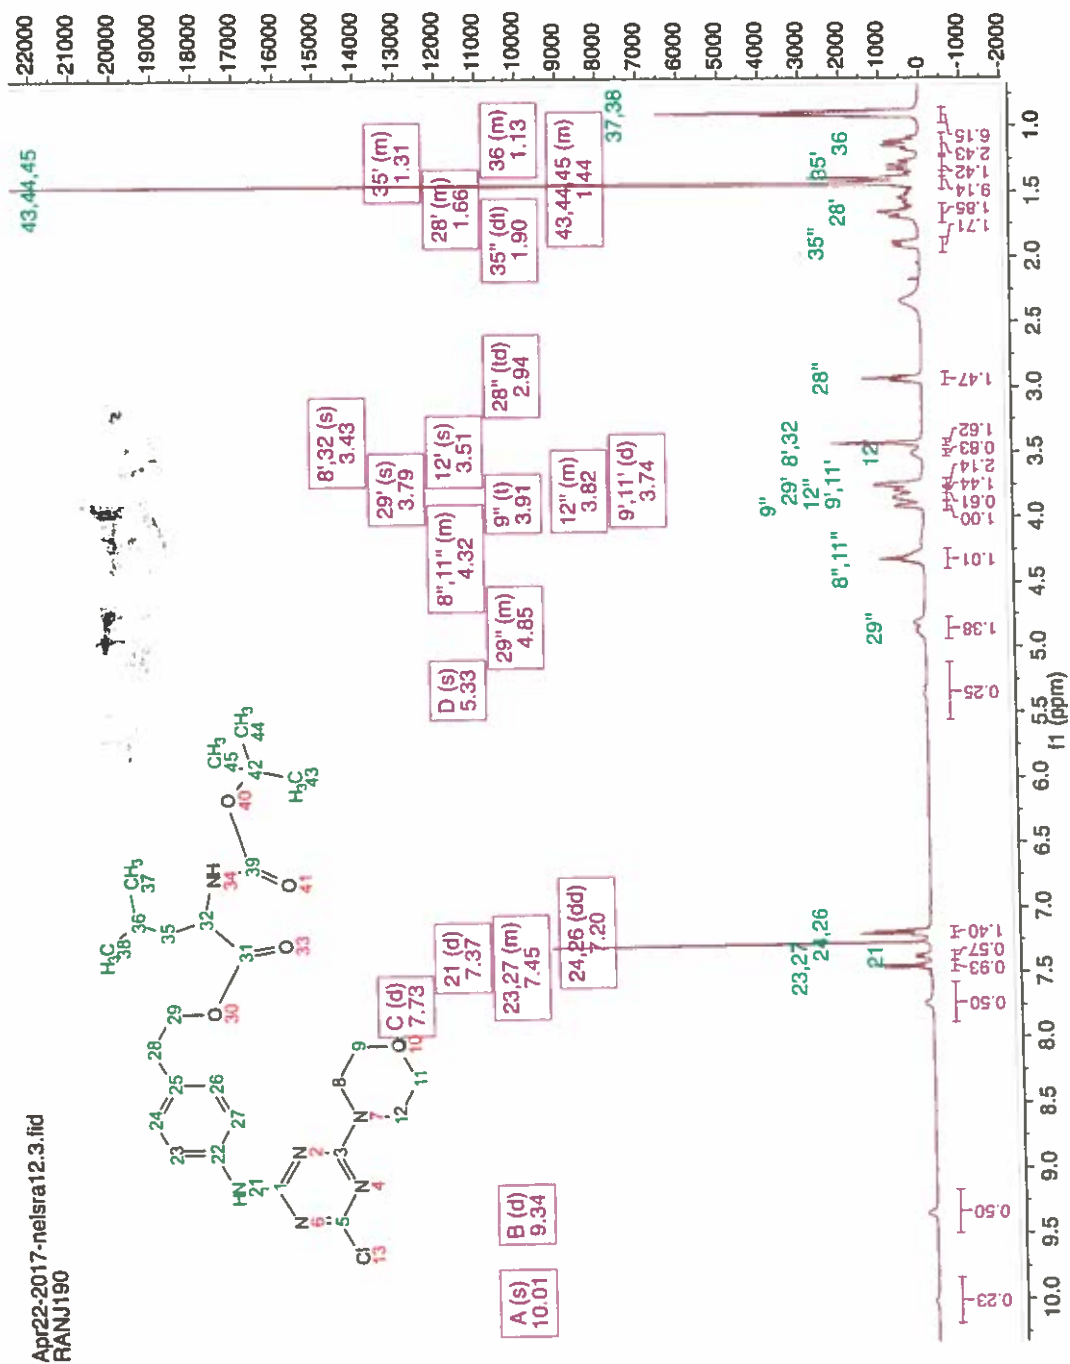

Intensity  
TIC  
RANU191 2016.11.09 12:29:09  
ESI+

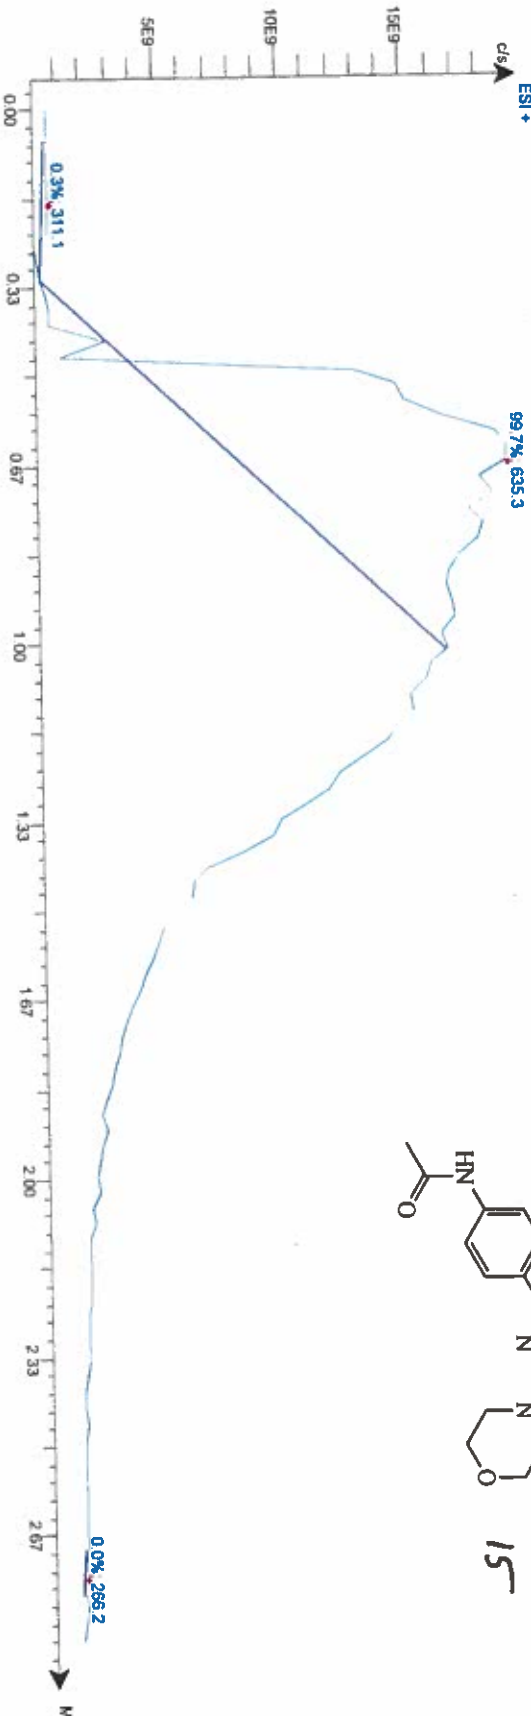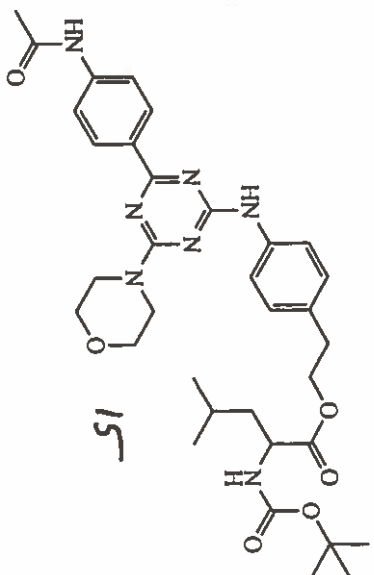

Spectrum RT 0.49 - 1.42 (33 scans)  
RANU191 2016.11.09 12:29:09  
ESI+ Max: 2658

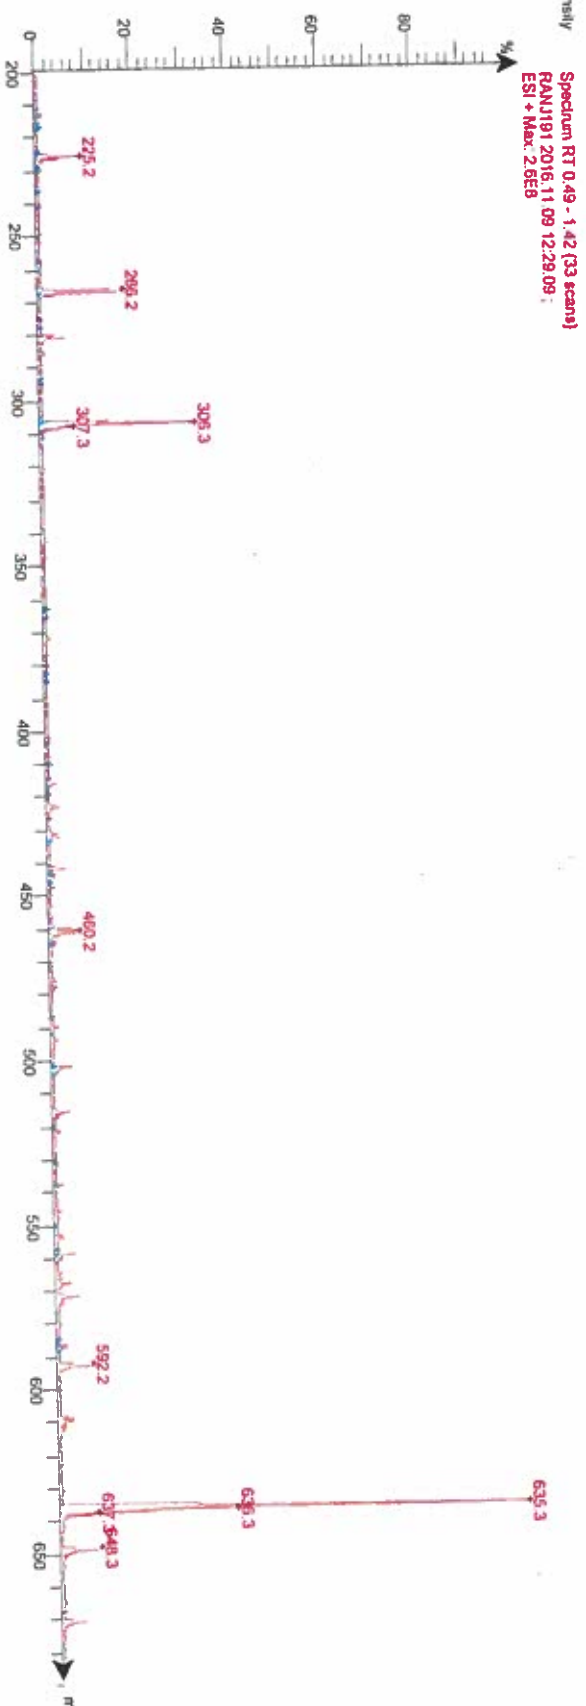

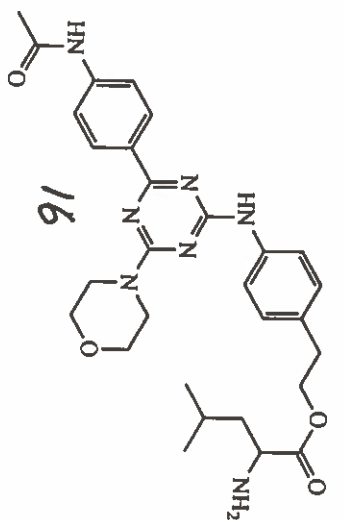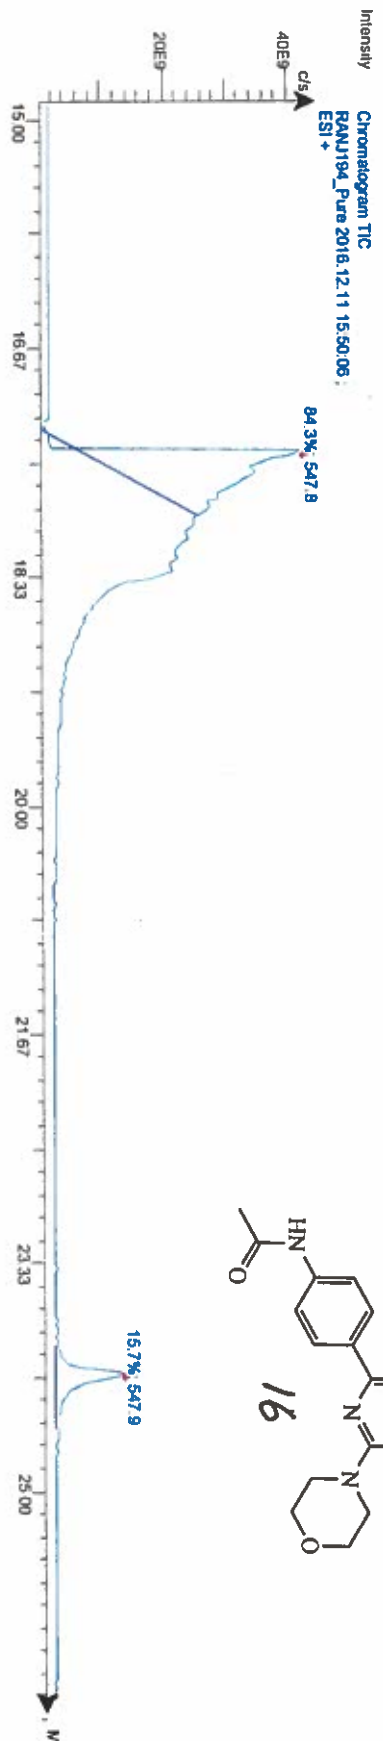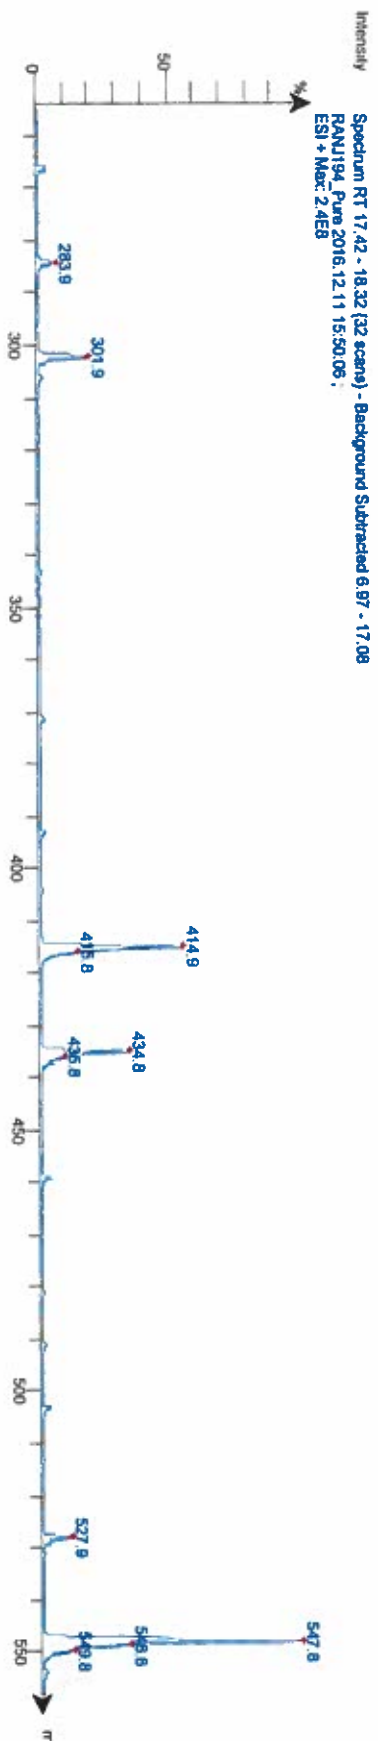

**Qualitative measure of Compound 12's PI3K pathway inhibition by measuring activated p-Akt T308 through a Western blot analysis**

| Untreated | ZSTK474 | Compound <b>12</b> |      |     |       |
|-----------|---------|--------------------|------|-----|-------|
|           | 10μM    | 100μM              | 10μM | 1μM | 0.1μM |

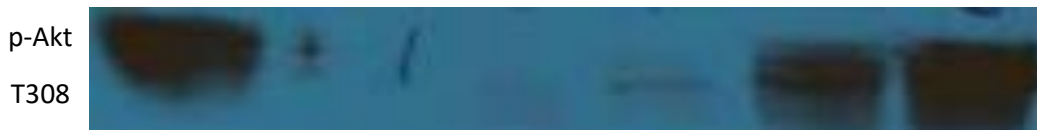

**Qualitative measure of Compound 13b's PI3K pathway inhibition by measuring activated p-Akt T308 through a Western blot analysis**

| Untreated | ZSTK474 |     |       | Compound <b>13b</b> |     |       |
|-----------|---------|-----|-------|---------------------|-----|-------|
|           | 10μM    | 1μM | 0.1μM | 10μM                | 1μM | 0.1μM |

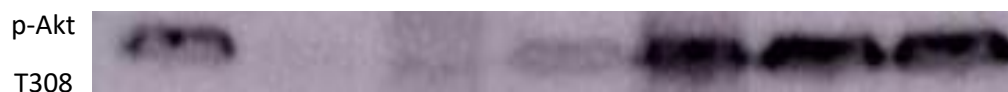

**Qualitative measure of Compound 13d's PI3K pathway inhibition by measuring activated p-Akt S473 through a Western blot analysis**

| Untreated | ZSTK474 |     |       | Compound <b>13d</b> |     |       |
|-----------|---------|-----|-------|---------------------|-----|-------|
|           | 10μM    | 1μM | 0.1μM | 10μM                | 1μM | 0.1μM |

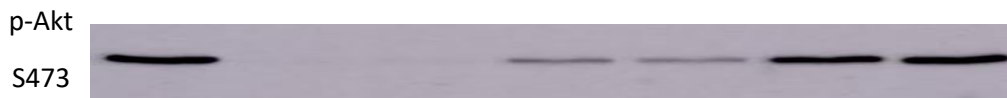

**Qualitative measure of Compound 13f's PI3K pathway inhibition by measuring activated p-Akt S473 through a Western blot analysis**

| Untreated | ZSTK474 |     |       | Compound <b>13f</b> |     |       |
|-----------|---------|-----|-------|---------------------|-----|-------|
|           | 10μM    | 1μM | 0.1μM | 10μM                | 1μM | 0.1μM |

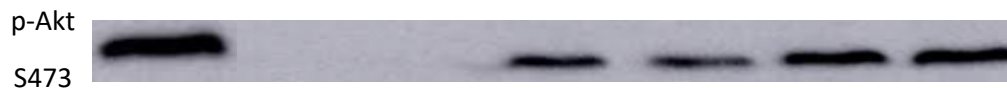

**Qualitative measure of Compound 11c's PI3K pathway inhibition by measuring activated p-Akt S476 through a Western blot analysis (RANJ180 = 11c in paper)**

10, 1, 0.1 10, 1, 0.1  $\mu$ M for each

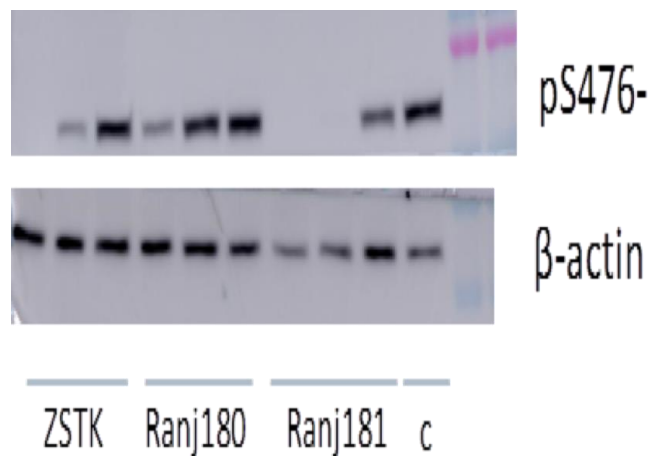

Supplement: s1 [file s1]
